# Supplementary material for: Genomic Diversity and Geographic Distribution of Newcastle Disease Virus Genotypes in Africa: Implications for Diagnosis, Vaccination, and Regional Collaboration
Source: MDPI journal article supplement (doi:10.3390/v16050795), 2024-05-16
Supplement: s1 [file s1]

**Table S3: Distribution of class II NDV genotypes in Western Africa**

| Country       | Paper | Isolate GenBank accession number | Genotype | Year of collection | Country     | Isolate name                              | Reference                      |
|---------------|-------|----------------------------------|----------|--------------------|-------------|-------------------------------------------|--------------------------------|
| Côte d'Ivoire | 1     | FJ772466                         | XVII     | 2008               | Ivory Coast | chicken/Ivory Coast/2601/2008             | (Cattoli <i>et al.</i> , 2010) |
|               | 2     | HF969127                         | XVIII.2  | 2007               | Ivory Coast | chicken/Ivory Coast/CIV08-069/2007        | (Snoeck, <i>et al.</i> , 2013) |
|               |       | HF969126                         | XVIII.2  | 2006               | Ivory Coast | duck/Ivory Coast/CIV08-062/2006           |                                |
|               |       | HF969179                         | XVIII.1  | 2007               | Ivory Coast | chicken Ivory Coast/CIV08-026/2007        |                                |
|               |       | HF969218                         | XVIII.2  | 2007               | Ivory Coast | chicken/Ivory Coast/CIV08-042/2007        |                                |
|               |       | HF969183                         | XVIII.1  | 2007               | Ivory Coast | chicken/Ivory Coast/CIV08-044/2007        |                                |
|               |       | HF969185                         | XVII     | 2007               | Ivory Coast | chicken/Ivory Coast/CIV08-104/2007        |                                |
|               | 3     | HG326600                         | XVIII    | 2006               | Ivory Coast | village weaver/Ivory Coast/CIV08-032/2006 | (Snoeck, <i>et al.</i> , 2013) |
| Benin         | 1     | JX546255                         | VII      | 2009               | Benin       | APMV-1/chicken/Benin/432MT/2009           | (Samuel <i>et al.</i> , 2013)  |
|               |       | JX546256                         | VII      | 2009               | Benin       | APMV-1/chicken/Benin/467MC/2009           |                                |
|               |       | JX546257                         | VII      | 2009               | Benin       | APMV-1/chicken/Benin/476MT/2009           |                                |
|               |       | JX546258                         | VII      | 2009               | Benin       | APMV-1/chicken/Benin/480MT/2009           |                                |
|               |       | JX546259                         | VII      | 2009               | Benin       | APMV-1/chicken/Benin/415MC/2009           |                                |
|               |       | JX546246                         | VII      | 2009               | Benin       | APMV-1/chicken/Benin/474MC/2009           |                                |
|               |       | JX546260                         | VII      | 2009               | Benin       | APMV-1/chicken/Benin/442MT/2009           |                                |
|               |       | JX546261                         | VII      | 2009               | Benin       | APMV-1/chicken/Benin/479MT/2009           |                                |
|               |       | JX546262                         | VII      | 2009               | Benin       | APMV-1/chicken/Benin/382GT/2009           |                                |
|               |       | JX546263                         | VII      | 2009               | Benin       | APMV-1/chicken/Benin/847GC/2009           |                                |
|               |       | JX546264                         | VII      | 2009               | Benin       | APMV-1/chicken/Benin/380GC/2009           |                                |
|               |       | JX546265                         | VII      | 2009               | Benin       | APMV-1/chicken/Benin/372GC/2009           |                                |
|               |       | JX546266                         | VII      | 2009               | Benin       | APMV-1/chicken/Benin/796GT/2009           |                                |
|               |       | JX546267                         | VII      | 2009               | Benin       | APMV-1/chicken/Benin/349GC/2009           |                                |
|               |       | JX546268                         | VII      | 2009               | Benin       | APMV-1/chicken/Benin/770GT/2009           |                                |
|               |       | JX546269                         | VII      | 2009               | Benin       | APMV-1/chicken/Benin/379GT/2009           |                                |
|               |       | JX546270                         | VII      | 2009               | Benin       | APMV-1/chicken/Benin/378GT/2009           |                                |

|                     |          |          |         |      |              |                                      |                                   |
|---------------------|----------|----------|---------|------|--------------|--------------------------------------|-----------------------------------|
|                     |          | JX546271 | VII     | 2009 | Benin        | APMV-1/chicken/Benin/846GC/2009      |                                   |
|                     |          | JX546245 | VII     | 2009 | Benin        | APMV-1/chicken/Benin/463MT/2009      |                                   |
|                     |          | JX546247 | VII     | 2009 | Benin        | APMV-1/chicken/Benin/488MT/2009      |                                   |
|                     |          | JX546244 | VII     | 2009 | Benin        | APMV-1/chicken/Benin/376GT/2009      |                                   |
|                     |          | JX546243 | VII     | 2009 | Benin        | APMV-1/chicken/Benin/373GC/2009      |                                   |
|                     | <b>2</b> | JX546245 | XIV.2   | 2009 | Benin        | chicken/Benin/463MT/2009             | (Snoeck <i>et al.</i> , 2013)     |
|                     |          | JX546243 | XVII    | 2009 | Benin        | chicken/Benin/373GC/2009             |                                   |
|                     |          | JX546244 | XVII    | 2009 | Benin        | chicken/Benin/376GT/2009             |                                   |
|                     |          | JX546247 | XVII    | 2009 | Benin        | chicken/Benin/488MT/2009             |                                   |
| <b>Burkina Faso</b> | <b>1</b> | FM200808 | XIV     | 2006 | Burkina Faso | chicken/Burkina Faso/SKF4.1/2006     | (Snoeck <i>et al.</i> , 2009)     |
|                     |          | FM200806 | XIV     | 2006 | Burkina Faso | chicken/Burkina Faso/SKF4.2/2006     |                                   |
|                     |          | FM200832 | XIV     | 2006 | Burkina Faso | duck/Burkina Faso/C3/2006            |                                   |
|                     |          | FM200807 | XIV     | 2006 | Burkina Faso | chicken/Burkina Faso/SKF1.2/2006     |                                   |
|                     |          | FM200827 | XVII    | 2006 | Burkina Faso | chicken/Burkina Faso/5.11/2006       |                                   |
|                     |          | FM200805 | XVII    | 2006 | Burkina Faso | chicken/Burkina Faso/5.18/2006       |                                   |
|                     |          | FM200804 | XVII    | 2006 | Burkina Faso | chicken/Burkina Faso/5.2/2006        |                                   |
|                     |          | FM200830 | II      | 2006 | Burkina Faso | chicken/Burkina Faso/9.12/2006       |                                   |
|                     |          | FM200828 | II      | 2006 | Burkina Faso | chicken/Burkina Faso/9.2/2006        |                                   |
|                     |          | FM200829 | II      | 2006 | Burkina Faso | chicken/Burkina Faso/9.8/2006        |                                   |
|                     |          | FM200826 | II      | 2006 | Burkina Faso | chicken/Burkina Faso/5.5/2006        |                                   |
|                     | <b>2</b> | FJ772463 | XVIII.1 | 2008 | Burkina Faso | Burkina Faso/2415-580/2008           | (Cattoli <i>et al.</i> , 2010)    |
|                     |          | FJ772458 | XVIII.1 | 2008 | Burkina Faso | Burkina Faso/2415-361/2008           |                                   |
| <b>Ghana</b>        | <b>1</b> | MT335751 | XVIII.2 | 2018 | Ghana        | NE-29A-B2/chicken/Pokoasi/Ghana/2018 | (da Silva <i>et al.</i> , 2020)   |
|                     |          | MT335752 | XVIII.2 | 2018 | Ghana        | NE-28A-B1/chicken/Wa/Ghana/2018      |                                   |
|                     |          | MT335753 | XVIII.2 | 2018 | Ghana        | NE-28A-B2/chicken/Wa/Ghana/2018      |                                   |
|                     |          | MT335754 | XVIII.2 | 2018 | Ghana        | NE-28A-B3/chicken/Wa/Ghana/2018      |                                   |
| <b>Mali</b>         | <b>1</b> | JF966385 | XIV.1   | 2008 | Mali         | 2008/Mali/ML007/08                   | (de Almeida <i>et al.</i> , 2013) |
|                     |          | JF966386 | XIV     | 2007 | Mali         | 2007/Mali/ML029/07                   |                                   |
|                     |          | JF966387 | XIV.2   | 2009 | Mali         | 2009/Mali/ML008                      |                                   |
|                     |          | JF966388 | XIV.2   | 2008 | Mali         | 2008/Mali/ML225/08                   |                                   |
|                     |          | JF966389 | XIV.2   | 2007 | Mali         | 2007/Mali/ML038/07                   |                                   |

|                   |          |          |            |      |            |                                              |                                |
|-------------------|----------|----------|------------|------|------------|----------------------------------------------|--------------------------------|
|                   |          | JX518885 | XIV.2      | 2010 | Mali       | 2010/Mali/ML57051T                           |                                |
|                   |          | JX518886 | XIV.2      | 2010 | Mali       | 2010/Mali/ML57072T                           |                                |
| <b>Mauritania</b> | <b>1</b> | FJ772455 | XVII       | 2006 | Mauritania | avian-1532-14-Mauritania-2006                | (Cattoli <i>et al.</i> , 2010) |
| <b>Niger</b>      | <b>1</b> | FM200838 | XIV.1      | 2007 | Niger      | chicken/Niger/47/2007                        | (Snoeck <i>et al.</i> , 2009)  |
|                   |          | FM200836 | XIV.1      | 2007 | Niger      | chicken/Niger/36/2007                        |                                |
|                   |          | FM200809 | XIV.1      | 2007 | Niger      | chicken/Niger/38/2007                        |                                |
|                   |          | FM200837 | XIV.1      | 2007 | Niger      | chicken/Niger/46/2007                        |                                |
|                   |          | FM200835 | XVII       | 2006 | Niger      | duck/Niger/30/2007                           |                                |
|                   |          | FM200833 | XVII       | 2006 | Niger      | duck/Niger/28/2007                           |                                |
|                   |          | FM200834 | XVII       | 2006 | Niger      | duck/Niger/29/2007                           |                                |
|                   | <b>2</b> | FJ772452 | XIV        | 2006 | Niger      | chicken-1377-8-Niger-2006                    | (Cattoli <i>et al.</i> , 2010) |
|                   |          | FJ772469 | XIV        | 2008 | Niger      | chicken-2602-348-Niger-2008                  |                                |
|                   |          | FJ772472 | XIV        | 2008 | Niger      | chicken-2602-468-Niger-2008                  |                                |
|                   |          | FJ772475 | XIV        | 2008 | Niger      | chicken-2602-605-Niger-2008                  |                                |
|                   |          | FJ772481 | XIV        | 2008 | Niger      | chicken-2602-625-Niger-2008                  |                                |
|                   | <b>3</b> | MT543153 | XIV.2      | 2019 | Niger      | NDV/Chicken/Niger/89/2019                    | (Souley <i>et al.</i> , 2021)  |
|                   |          | MT543154 | XVIII.1    | 2019 | Niger      | NDV/Chicken/Niger/221/2019                   |                                |
|                   |          | MT543155 | XVIII.1    | 2019 | Niger      | NDV/Chicken/Niger/222/2019                   |                                |
|                   |          | MT543156 | XVIII.1    | 2019 | Niger      | NDV/Chicken/Niger/224/2019                   |                                |
|                   |          | MT543157 | XVIII.1    | 2019 | Niger      | NDV/Chicken/Niger/248/2019                   |                                |
|                   |          | MT543158 | XVIII.1    | 2019 | Niger      | NDV/Chicken/Niger/250/2019                   |                                |
|                   |          | MT543159 | XIV.2      | 2019 | Niger      | NDV/Chicken/Niger/255/2019                   |                                |
|                   |          | MT543160 | XIV.2      | 2019 | Niger      | NDV/Chicken/Niger/261/2019                   |                                |
|                   |          | MT543161 | XIV.2      | 2019 | Niger      | NDV/Chicken/Niger/262/2019                   |                                |
|                   |          | MT543162 | XIV.2      | 2019 | Niger      | NDV/Chicken/Niger/270/2019                   |                                |
| <b>Nigeria</b>    | <b>1</b> | FJ772486 | XVIII.1    | 2008 | Nigeria    | avian-3724-6-Nigeria-2008                    | (Cattoli <i>et al.</i> , 2010) |
|                   |          | FJ772446 | XIV.1      | 2006 | Nigeria    | avian-913-1-Nigeria-2006                     |                                |
|                   |          | FJ772449 | XIV.1      | 2006 | Nigeria    | avian-913-33-Nigeria-2006                    |                                |
|                   | <b>2</b> | HG424626 | XXI.2      | 2013 | Nigeria    | pigeon/Nigeria/NIE13-008/2013                | (Snoeck <i>et al.</i> , 2013)  |
|                   |          | HG424625 | XXI.2      | 2013 | Nigeria    | pigeon/Nigeria/NIE13-005/2013                |                                |
|                   |          | HG326602 | VI.1.2.1.2 | 2007 | Nigeria    | pigeon/Nigeria/NIE07-062/2007                |                                |
|                   |          | HG326601 | VI.1.2.1.2 | 2007 | Nigeria    | pigeon/Nigeria/NIE07-061/2007                |                                |
|                   |          | HG326603 | VI.1.2.1.2 | 2007 | Nigeria    | pigeon/Nigeria/NIE07-063/2007                |                                |
|                   |          | HG326604 | VI.1.2.1.2 | 2009 | Nigeria    | pigeon/Nigeria/NIE09-1898/2009               |                                |
|                   |          | HG424628 | VI.1.2.1.2 | 2013 | Nigeria    | pigeon/Nigeria/NIE13-093/2013                |                                |
|                   |          | HG424627 | VI.1.2.1.2 | 2013 | Nigeria    | pigeon/Nigeria/NIE13-092/2013                |                                |
|                   |          | HG326606 | I          | 2008 | Nigeria    | spur-winged<br>goose/Nigeria/NIE08-0124/2008 |                                |
|                   |          | HG326608 | I          | 2008 | Nigeria    | spur-winged<br>goose/Nigeria/NIE08-0273/2008 |                                |

|  |          |          |            |      |         |                                              |                               |
|--|----------|----------|------------|------|---------|----------------------------------------------|-------------------------------|
|  |          | HG326605 | I          | 2008 | Nigeria | spur-winged<br>goose/Nigeria/NIE08-0121/2008 |                               |
|  |          | HG326607 | I          | 2008 | Nigeria | spur-winged<br>goose/Nigeria/NIE08-0232/2008 |                               |
|  |          | HG424629 | VI.1.2.1.2 | 2013 | Nigeria | pigeon/Nigeria/NIE13-009/2013                |                               |
|  |          | HG424627 | VI.1.2.1.2 | 2013 | Nigeria | pigeon/Nigeria/NIE13-092/2013                |                               |
|  |          | HG424628 | VI.1.2.1.2 | 2013 | Nigeria | pigeon/Nigeria/NIE13-093/2013                |                               |
|  |          | HG326603 | VI.1.2.1.2 | 2007 | Nigeria | pigeon/Nigeria/NIE07-063/2007                |                               |
|  |          | HG326602 | VI.1.2.1.2 | 2007 | Nigeria | pigeon/Nigeria/NIE07-062/2007                |                               |
|  |          | HG326609 | I          | 2008 | Nigeria | spur-winged<br>goose/Nigeria/NIE08-0290/2008 |                               |
|  | <b>3</b> | HF969193 | XIV.1      | 2009 | Nigeria | chicken/Nigeria/NIE08-<br>2150/2009          | (Snoeck <i>et al.</i> , 2013) |
|  |          | HF969136 | XIV.1      | 2009 | Nigeria | chicken/Nigeria/NIE08-<br>2194/2009          |                               |
|  |          | HF969131 | XIV.1      | 2009 | Nigeria | chicken/Nigeria/NIE08-<br>2117/2009          |                               |
|  |          | HF969200 | XIV.1      | 2009 | Nigeria | chicken/Nigeria/NIE08-<br>2362/2009          |                               |
|  |          | HF969139 | XIV.1      | 2009 | Nigeria | chicken/Nigeria/NIE08-<br>2280/2009          |                               |
|  |          | HF969201 | XIV.2      | 2009 | Nigeria | chicken/Nigeria/NIE09-<br>1599/2009          |                               |
|  |          | HF969142 | XIV.2      | 2009 | Nigeria | chicken/Nigeria/NIE09-<br>1596/2009          |                               |
|  |          | HF969143 | XIV.2      | 2009 | Nigeria | chicken/Nigeria/NIE09-<br>1597/2009          |                               |
|  |          | HF969155 | XIV.1      | 2009 | Nigeria | chicken/Nigeria/NIE09-<br>2087/2009          |                               |
|  |          | HF969158 | XIV.1      | 2009 | Nigeria | avian/Nigeria/NIE09-2168/2009                |                               |
|  |          | HF969206 | XIV.1      | 2009 | Nigeria | chicken/Nigeria/NIE09-<br>2101/2009          |                               |
|  |          | HF969153 | XIV.1      | 2009 | Nigeria | chicken/Nigeria/NIE09-<br>2079/2009          |                               |
|  |          | HF969150 | XIV.1      | 2009 | Nigeria | chicken/Nigeria/NIE09-<br>2044/2009          |                               |
|  |          | HF969205 | XIV.1      | 2009 | Nigeria | turkey/Nigeria/NIE09-2071/2009               |                               |
|  |          | HF969144 | XIV.1      | 2009 | Nigeria | chicken/Nigeria/NIE09-<br>2009/2009          |                               |
|  |          | HF969167 | XIV.1      | 2011 | Nigeria | turkey/Nigeria/NIE10-082/2011                |                               |
|  |          | HF969190 | XIV.2      | 2009 | Nigeria | chicken/Nigeria/NIE08-<br>2032/2009          |                               |
|  |          | HF969187 | XIV.2      | 2009 | Nigeria | chicken/Nigeria/NIE08-<br>0453/2008          |                               |
|  |          | HF969141 | XIV.2      | 2009 | Nigeria | chicken/Nigeria/NIE08-<br>2359/2009          |                               |
|  |          | HF969178 | XIV.2      | 2009 | Nigeria | chicken/Nigeria/NIE08-<br>2270/2009          |                               |
|  |          | HF969133 | XIV.2      | 2009 | Nigeria | chicken/Nigeria/NIE08-<br>2159/2009          |                               |
|  |          | HF969198 | XIV.2      | 2013 | Nigeria | chicken/Nigeria/NIE08-<br>2279/2009          |                               |
|  |          | HF969212 | XIV.2      | 2009 | Nigeria | chicken/Nigeria/NIE10-318/2011               |                               |

|  |  |          |         |      |         |                                     |  |
|--|--|----------|---------|------|---------|-------------------------------------|--|
|  |  | HF969145 | XIV.2   | 2009 | Nigeria | chicken/Nigeria/NIE09-2014/2009     |  |
|  |  | HF969203 | XIV.2   | 2009 | Nigeria | turkey/Nigeria/NIE09-2021/2009      |  |
|  |  | HF969149 | XIV.2   | 2009 | Nigeria | chicken/Nigeria/NIE09-2041/2009     |  |
|  |  | HF969157 | XIV.2   | 2009 | Nigeria | chicken/Nigeria/NIE09-2166/2009     |  |
|  |  | HF969151 | XIV.2   | 2009 | Nigeria | chicken/Nigeria/NIE09-2053/2009     |  |
|  |  | HF969202 | XIV.2   | 2009 | Nigeria | chicken/Nigeria/NIE09-2013/2009     |  |
|  |  | HF969146 | XIV.2   | 2009 | Nigeria | chicken/Nigeria/NIE09-2017/2009     |  |
|  |  | HF969214 | XIV.2   | 2011 | Nigeria | chicken/Nigeria/NIE10-333/2011      |  |
|  |  | HF969162 | XIV.2   | 2011 | Nigeria | chicken/Nigeria/NIE10-032/2011      |  |
|  |  | HF969169 | XIV.2   | 2011 | Nigeria | chicken/Nigeria/NIE10-150/2011      |  |
|  |  | HF969210 | XIV.2   | 2011 | Nigeria | chicken/Nigeria/NIE10-139/2011      |  |
|  |  | HF969163 | XIV.2   | 2011 | Nigeria | chicken/Nigeria/NIE10-034/2011      |  |
|  |  | HF969172 | XIV.2   | 2011 | Nigeria | chicken/Nigeria/NIE10-258/2011      |  |
|  |  | HF969213 | XIV.2   | 2011 | Nigeria | chicken/Nigeria/NIE10-325/2011      |  |
|  |  | HF969208 | XIV.2   | 2011 | Nigeria | chicken/Nigeria/NIE10-122/2011      |  |
|  |  | HF969166 | XIV.2   | 2011 | Nigeria | chicken/Nigeria/NIE10-076/2011      |  |
|  |  | HF969161 | XIV.2   | 2011 | Nigeria | chicken/Nigeria/NIE10-024/2011      |  |
|  |  | HF969236 | XIV.2   | 2011 | Nigeria | chicken/Nigeria/NIE10-409/2011      |  |
|  |  | HF969170 | XIV.2   | 2011 | Nigeria | chicken/Nigeria/NIE10-160/2011      |  |
|  |  | HF969173 | XIV.2   | 2011 | Nigeria | chicken/Nigeria/NIE10-302/2011      |  |
|  |  | HF969164 | XIV.2   | 2011 | Nigeria | chicken/Nigeria/NIE10-041/2011      |  |
|  |  | HF969211 | XIV.2   | 2011 | Nigeria | chicken/Nigeria/NIE10-263/2011      |  |
|  |  | HF969165 | XIV.2   | 2011 | Nigeria | chicken/Nigeria/NIE10-043/2011      |  |
|  |  | HF969217 | XVIII.2 | 2011 | Nigeria | chicken/Nigeria/NIE10-171/2011      |  |
|  |  | HF969216 | XVIII.2 | 2011 | Nigeria | chicken/Nigeria/NIE11-1286/2011     |  |
|  |  | HF969194 | XVII    | 2009 | Nigeria | chicken/Nigeria/NIE08-2199/2009     |  |
|  |  | HF969196 | XVII    | 2009 | Nigeria | chicken/Nigeria/NIE08-2261/2009     |  |
|  |  | HF969128 | XVII    | 2007 | Nigeria | avian/Nigeria/NIE07-216/2007        |  |
|  |  | HF969137 | XVII    | 2009 | Nigeria | chicken/Nigeria/NIE08-2208/2009     |  |
|  |  | HF969130 | XVII    | 2009 | Nigeria | guinea fowl/Nigeria/NIE08-2004/2009 |  |
|  |  | HF969138 | XVII    | 2009 | Nigeria | chicken/Nigeria/NIE08-2224/2009     |  |
|  |  | HF969191 | XVII    | 2009 | Nigeria | chicken/Nigeria/NIE08-2042/2009     |  |
|  |  | HF969192 | XVII    | 2009 | Nigeria | chicken/Nigeria/NIE08-2119/2009     |  |
|  |  | HF969135 | XVII    | 2009 | Nigeria | chicken/Nigeria/NIE08-2187/2009     |  |
|  |  | HF969195 | XVII    | 2009 | Nigeria | chicken/Nigeria/NIE08-2247/2009     |  |

|  |          |          |         |      |         |                                        |                                 |
|--|----------|----------|---------|------|---------|----------------------------------------|---------------------------------|
|  |          | HF969134 | XVII    | 2009 | Nigeria | chicken/Nigeria/NIE08-2168/2009        |                                 |
|  |          | HF969197 | XVII    | 2009 | Nigeria | chicken/Nigeria/NIE08-2267/2009        |                                 |
|  |          | HF969140 | XVII    | 2009 | Nigeria | chicken/Nigeria/NIE08-2340/2009        |                                 |
|  |          | HF969132 | XVII    | 2009 | Nigeria | chicken/Nigeria/NIE08-2149/2009        |                                 |
|  |          | HF969141 | XVII    | 2009 | Nigeria | chicken/Nigeria/NIE08-2349/2009        |                                 |
|  |          | HF969188 | XVII    | 2008 | Nigeria | chicken/Nigeria/NIE08-1365/2008        |                                 |
|  |          | HF969189 | XVII    | 2008 | Nigeria | chicken/Nigeria/NIE08-1366/2008        |                                 |
|  |          | HF969129 | XVII    | 2008 | Nigeria | chicken/Nigeria/NIE08-1363/2008        |                                 |
|  |          | HF969207 | XVII    | 2009 | Nigeria | avian/Nigeria/NIE09-2167/2009          |                                 |
|  |          | HF969148 | XVII    | 2009 | Nigeria | chicken/Nigeria/NIE09-2034/2009        |                                 |
|  |          | HF969152 | XVII    | 2009 | Nigeria | chicken/Nigeria/NIE09-2072/2009        |                                 |
|  |          | HF969154 | XVII    | 2009 | Nigeria | chicken/Nigeria/NIE09-2083/2009        |                                 |
|  |          | HF969204 | XVII    | 2009 | Nigeria | chicken/Nigeria/NIE09-2028/2009        |                                 |
|  |          | HF969147 | XVII    | 2009 | Nigeria | chicken/Nigeria/NIE09-2031/2009        |                                 |
|  |          | HF969156 | XVII    | 2009 | Nigeria | chicken/Nigeria/NIE09-2128/2009        |                                 |
|  |          | HF969215 | XVII    | 2011 | Nigeria | chicken/Nigeria/NIE10-335/2011         |                                 |
|  |          | HF969174 | XVII    | 2011 | Nigeria | chicken/Nigeria/NIE10-304/2011         |                                 |
|  |          | HF969175 | XVII    | 2011 | Nigeria | chicken/Nigeria/NIE10-306/2011         |                                 |
|  |          | HF969176 | XVII    | 2011 | Nigeria | chicken/Nigeria/NIE10-310/2011         |                                 |
|  |          | HF969209 | XVII    | 2011 | Nigeria | chicken/Nigeria/NIE10-123/2011         |                                 |
|  |          | HF969168 | XVII    | 2014 | Nigeria | chicken/Nigeria/NIE10-124/2011         |                                 |
|  | <b>4</b> | JQ039385 | XXI.1.1 | 2007 | Nigeria | Dove/Nigeria/VRD07-163/2007            | (van Borm <i>et al.</i> , 2012) |
|  |          | JQ039386 | XIV     | 2008 | Nigeria | chicken/Nigeria/VRD08-36/2008          |                                 |
|  |          | JQ039387 | VI.1.1  | 2008 | Nigeria | pigeon/Nigeria/VRD08-37BRpe(7-9)/2008  |                                 |
|  |          | JQ039388 | VI.1.1  | 2008 | Nigeria | pigeon/Nigeria/VRD08-37(10-11-13)/2008 |                                 |
|  |          | JQ039389 | VI.1.1  | 2007 | Nigeria | pigeon/Nigeria/VRD07-369/2007          |                                 |
|  |          | JQ039390 | XIV     | 2007 | Nigeria | chicken/Nigeria/VRD07-233/2007         |                                 |
|  |          | JQ039391 | VI.1.1  | 2007 | Nigeria | pigeon/Nigeria/VRD07-231/2007          |                                 |
|  |          | JQ039392 | XVII    | 2007 | Nigeria | avian/Nigeria/VRD07-733/2007           |                                 |
|  |          | JQ039393 | XVII    | 2007 | Nigeria | chicken/Nigeria/VRD07-141/2007         |                                 |
|  |          | JQ039394 | XVII    | 2007 | Nigeria | chicken/Nigeria/VRD07-410/2007         |                                 |
|  |          | JQ039395 | XXI.1.1 | 2007 | Nigeria | Pigeon/Nigeria/VRD07-173/2007          |                                 |

|  |   |          |            |           |         |                                 |                              |
|--|---|----------|------------|-----------|---------|---------------------------------|------------------------------|
|  |   | JQ039396 | XVII       | 2007      | Nigeria | chicken/Nigeria/VRD07-121B/2007 |                              |
|  | 5 | MH996911 | I.1.1      | 2009      | Nigeria | BS/350 (N35)                    | (Welch <i>et al.</i> , 2019) |
|  |   | MH996910 | I.1.1      | 2009      | Nigeria | JN/469 (N44)                    |                              |
|  |   | MH996912 | II         | 2010      | Nigeria | BKK/497 (N27)                   |                              |
|  |   | MH996917 | II         | 2002/2003 | Nigeria | BN08 (N50)                      |                              |
|  |   | MH996915 | II         | 2009      | Nigeria | LTS/08 (N25)                    |                              |
|  |   | MH996916 | II         | 2002/2003 | Nigeria | PL JZ04 (N49)                   |                              |
|  |   | MH996914 | II         | 2002/2003 | Nigeria | PL038 (N47)                     |                              |
|  |   | MH996913 | II         | 2004      | Nigeria | VRD17/04 (N2)                   |                              |
|  |   | MH996920 | VI.1.2.1.2 | 2008      | Nigeria | VRD08/385 (N23)                 |                              |
|  |   | MH996942 | XIV.2      | 2009      | Nigeria | GM/GMM/17- 18T (N14)            |                              |
|  |   | MH996919 | XIV.2      | 2009      | Nigeria | JG/DT/30-31T (N18)              |                              |
|  |   | MH996938 | XIV.2      | 2009      | Nigeria | JG/SH/47C (N15)                 |                              |
|  |   | MH996930 | XIV.2      | 2009      | Nigeria | JN/469 (N44)                    |                              |
|  |   | MH996946 | XIV.2      | 2009      | Nigeria | KT/JBY/09T (N40)                |                              |
|  |   | MH996937 | XIV.2      | 2009      | Nigeria | KT/KNK/01T (N13)                |                              |
|  |   | MH996922 | XIV.2      | 2009      | Nigeria | KT/MSH/15C (N2)                 |                              |
|  |   | MH996941 | XIV.2      | 2009      | Nigeria | NS/KF/06- 09C (N46)             |                              |
|  |   | MH996945 | XIV.2      | 2009      | Nigeria | VRD09/025 (N21)                 |                              |
|  |   | MH996927 | XIV.2      | 2009      | Nigeria | VRD09/340 (N50)                 |                              |
|  |   | MH996923 | XIV.2      | 2009      | Nigeria | VRD09/546 (N4)                  |                              |
|  |   | MH996943 | XIV.2      | 2009      | Nigeria | YB/GSH1/4- 6T (N3)              |                              |
|  |   | MH996934 | XIV.2      | 2009      | Nigeria | YB/GSHI/07T (N5)                |                              |
|  |   | MH996921 | XVII       | 2010      | Nigeria | AD/WB/12C (N29)                 |                              |
|  |   | MH996918 | XVII       | 2009      | Nigeria | BA/BAUR/07T (N17)               |                              |
|  |   | MH996925 | XVII       | 2009      | Nigeria | BA/TFB/14C (N38)                |                              |
|  |   | MH092811 | XVII       | 2010      | Nigeria | BKK/497 (N27)                   |                              |
|  |   | MH996926 | XVII       | 2009      | Nigeria | BO/MMC/ AGN/06- 07T (N42)       |                              |
|  |   | MH996939 | XVII       | 2009      | Nigeria | JG/SH/47C (N15)                 |                              |
|  |   | MH092808 | XVII       | 2009      | Nigeria | JN/327 (N24)                    |                              |
|  |   | MH996928 | XVII       | 2009      | Nigeria | KD/TW/03T (N45)                 |                              |
|  |   | MH996929 | XVII       | 2009      | Nigeria | KG/LOM/11- 16 (N11)             |                              |
|  |   | MH092810 | XVII       | 2009      | Nigeria | KN/399 (N26)                    |                              |
|  |   | MH996931 | XVII       | 2009      | Nigeria | KT/MA/5-6C (N7)                 |                              |
|  |   | MH092809 | XVII       | 2009      | Nigeria | LTS/08 (N25)                    |                              |
|  |   | MH996933 | XVII       | 2009      | Nigeria | LTS/11T (N38)                   |                              |
|  |   | MH996940 | XVII       | 2009      | Nigeria | NS/KR/60- 61C (N16)             |                              |
|  |   | MH996932 | XVII       | 2002/2003 | Nigeria | PL038 (N47)                     |                              |
|  |   | MH996944 | XVII       | 2009      | Nigeria | YB/GSH1/4- 6T (N3)              |                              |
|  |   | MH996935 | XVII       | 2009      | Nigeria | YB/GSHI/07T (N5)                |                              |
|  |   | MH996936 | XVII       | 2009      | Nigeria | YB/GSHI/9- 10C (N9)             |                              |
|  |   | MH996924 | XVII       | 2009      | Nigeria | ZM/KN/ GF01bC (N6)              |                              |

|             |          |          |        |      |         |                                        |                                |
|-------------|----------|----------|--------|------|---------|----------------------------------------|--------------------------------|
|             |          | MH392227 | XVII   | 2009 | Nigeria | OOT/4/1 (N69)                          |                                |
|             | <b>6</b> | MN046110 | XIV.2  | 2017 | Nigeria | PLJS-109/2017                          | (Abah <i>et al.</i> , 2020)    |
|             |          | MN046107 | XIV.2  | 2009 | Nigeria | PLJN-T11/2009                          |                                |
|             |          | MNO46108 | XVII   | 2009 | Nigeria | NSKR-DK56-59/2009                      |                                |
|             |          | MN046106 | XVII   | 2009 | Nigeria | PLJN -TSI/2009                         |                                |
|             |          | MN046109 | II     | 2017 | Nigeria | PLJS-137B /2017                        |                                |
|             | <b>7</b> | KC689333 | XVII   | 2010 | Nigeria | chicken-Nigeria-LC04-2010              | (Rinle <i>et al.</i> , 2019)   |
|             |          | KC689334 | XVII   | 2010 | Nigeria | chicken-Nigeria-LC03-2010              |                                |
|             |          | KC689335 | XVII   | 2010 | Nigeria | chicken-Nigeria-LC5-2010               |                                |
|             | <b>8</b> | FM200824 | XIV.1  | 2007 |         | Nigeria/S30/2007                       | (Snoeck <i>et al.</i> , 2009)  |
|             |          | FM200823 | XIV.1  | 2007 |         | Nigeria/S32/2007                       |                                |
|             |          | FM200821 | XIV.1  | 2007 |         | Nigeria/S17/2007                       |                                |
|             |          | FM200820 | XVII   | 2007 |         | Nigeria/S24/2007                       |                                |
|             |          | FM200825 | XVII   | 2007 |         | Nigeria/S36/2007                       |                                |
|             |          | FM200822 | XVII   | 2007 |         | Nigeria/S7/2007                        |                                |
|             |          | FM200796 | XVII   | 2007 |         | fowl/Nigeria/NIE93/2007                |                                |
|             |          | FM200797 | VI.1.1 | 2007 |         | pigeon/Nigeria/NIE95/2007              |                                |
|             |          | FM200798 | VI.1.1 | 2007 |         | Parrot/Nigeria/NIE139/2007             |                                |
|             |          | FM200803 | III    | 2006 |         | chicken/Nigeria/N90/2006               |                                |
|             |          | FM200799 | I      | 2006 |         | chicken/Nigeria/N400/2006              |                                |
|             |          | FM200800 | I      | 2005 |         | chicken/Nigeria/SH11/2005              |                                |
|             |          | FM200801 | II     | 2006 |         | chicken/Nigeria/N2/2006                |                                |
|             |          | FM200802 | II     | 2006 |         | chicken/Nigeria/N18/2006               |                                |
|             |          | FM200816 | II     | 2007 |         | turkey/Nigeria/NIE7/2007               |                                |
|             |          | FM200813 | II     | 2006 |         | chicken/Nigeria/N113/2006              |                                |
|             |          | FM200814 | II     | 2009 |         | chicken/Nigeria/N239/2009              |                                |
|             |          | FM200812 | II     | 2006 |         | chicken/Nigeria/N112/2006              |                                |
|             |          | FM200818 | II     | 2007 |         | Nigeria/S28/2007                       |                                |
|             |          | FM200819 | II     | 2007 |         | Nigeria/S38/2007                       |                                |
|             |          | FM200817 | II     | 2007 |         | turkey/Nigeria/NIE94/2007              |                                |
|             |          | FM200810 | II     | 2006 |         | chicken/Nigeria/N1/2006                |                                |
|             |          | FM200811 | II     | 2006 |         | chicken/Nigeria/N106/2006              |                                |
|             |          | FM200815 | II     | 2007 |         | turkey/Nigeria/NIE6/2007               |                                |
|             | <b>9</b> | HQ456869 | XVII   | 2007 | Nigeria | APMV-1/duck/Nigeria/Damaturu/26/07     | (Solomon <i>et al.</i> , 2012) |
|             |          | HQ456870 | XVII   | 2007 |         | APMV-1/duck/Nigeria/Damaturu/27/07     |                                |
|             |          | HQ456871 | XVII   | 2007 |         | APMV-1/guinea fowl/Nigeria/Minna/49/07 |                                |
|             |          | HQ456872 | XVII   | 2007 |         | APMV-1/guinea fowl/Nigeria/Gusau/53/07 |                                |
| <b>Togo</b> | <b>1</b> | JX390609 | VII    | 2009 | Togo    | chicken/Togo/AKO18/2009                | (Kim <i>et al.</i> , 2012)     |



|  |   |          |     |      |      |                                |                               |
|--|---|----------|-----|------|------|--------------------------------|-------------------------------|
|  | 2 | JX546272 | VII | 2009 | Togo | APMV-1/duck/Togo/GB05/2009     | (Samuel <i>et al.</i> , 2013) |
|  |   | JX546273 | VII | 2009 | Togo | APMV-1/chicken/Togo/AKC12/2009 |                               |
|  |   | JX546274 | VII | 2009 | Togo | APMV-1/duck/Togo/AKC14/2009    |                               |
|  |   | JX546275 | VII | 2009 | Togo | APMV-1/chicken/Togo/AKO11/2009 |                               |
|  |   | JX390609 | VII | 2009 | Togo | APMV-1/chicken/Togo/AKO18/2009 |                               |

## References

- Abah, H. O., Shittu, I., Abdu, P. A., & Aronu, C. J. (2020). Molecular characterization and phylogenetic analysis of Newcastle disease virus isolated from poultry in North Central States of Nigeria. *Journal of Veterinary Medicine and Animal Health*, 12(2), 20–26. <https://doi.org/10.5897/jvmah2019.0825>
- Cattoli, G., Fusaro, A., Monne, I., Molia, S., Le Menach, A., Maregeya, B., Nchare, A., Bangana, I., Maina, A. G., N’Goran Koffi, J. N., Thiam, H., Bezeid, O. E. M. A., Salviato, A., Nisi, R., Terregino, C., & Capua, I. (2010). Emergence of a new genetic lineage of Newcastle disease virus in West and Central Africa-Implications for diagnosis and control. *Veterinary Microbiology*, 142(3–4), 168–176. <https://doi.org/10.1016/j.vetmic.2009.09.063>
- da Silva, A. P., Aston, E. J., Chiwanga, G. H., Birakos, A., Muhairwa, A. P., Kayang, B. B., Kelly, T., Zhou, H., & Gallardo, R. A. (2020). Molecular characterization of newcastle disease viruses isolated from chickens in Tanzania and Ghana. *Viruses*, 12(9). <https://doi.org/10.3390/v12090916>
- de Almeida, R. S., Hammoumi, S., Gil, P., Briand, F. X., Molia, S., Gaidet, N., Cappelle, J., Chevalier, V., Balança, G., Traoré, A., Grillet, C., Maminiaina, O. F., Guendouz, S., Dakouo, M., Samaké, K., Bezeid, O. E. M., Diarra, A., Chaka, H., Goutard, F., ... Albina, E. (2013). New Avian Paramyxoviruses Type I Strains Identified in Africa Provide New Outcomes for Phylogeny Reconstruction and Genotype Classification. *PLoS ONE*, 8(10). <https://doi.org/10.1371/journal.pone.0076413>
- Kim, S.-H., Nayak, S., Paldurai, A., Nayak, B., Samuel, A., Aplogan, G. L., Awoume, K. A., Webby, R. J., Ducatez, M. F., Collins, P. L., & Samal, S. K. (2012). Complete Genome Sequence of a Novel Newcastle Disease Virus Strain Isolated from a Chicken in West Africa. *Journal of Virology*, 86(20), 11394–11395. <https://doi.org/10.1128/jvi.01922-12>
- Rinle, K. P., Nelson, E. K. A., Said, A. J., Peter, C. T. P., Davou, M. G., Mojisola, A. D., Kelvin, A. S., Gigiya, I. N. D., Blessing, O. S., Joshua, B. I., Rinle, K. P., Nelson, E. K. A., Said, A. J., Peter, C. T. P., Davou, M. G., Mojisola, A. D., Kelvin, A. S., Gigiya, I. N. D., Blessing, O. S., & Joshua, B. I. (2019). Molecular characterization and phylogenetic studies of a virulent newcastle disease virus detected in indigenous chickens in plateau state, Nigeria. <https://Wjarr.Com/Sites/Default/Files/WJARR-2018-0005.Pdf>, 1(1), 027–034. <https://doi.org/10.30574/WJARR.2019.1.1.0005>

- Samuel, A., Nayak, B., Paldurai, A., Xiao, S., Aplogan, G. L., Awoume, K. A., Webby, R. J., Ducatez, M. F., Collins, P. L., & Samal, S. K. (2013). Phylogenetic and pathotypic characterization of newcastle disease viruses circulating in west Africa and efficacy of a current vaccine. *Journal of Clinical Microbiology*, 51(3), 771–781. <https://doi.org/10.1128/JCM.02750-12>
- Snoeck, C. J., Adeyanju, A. T., Owoade, A. A., Couacy-Hymann, E., Alkali, B. R., Ottosson, U., & Muller, C. P. (2013). Genetic diversity of newcastle disease virus in wild birds and pigeons in West Africa. *Applied and Environmental Microbiology*, 79(24), 7867–7874. <https://doi.org/10.1128/AEM.02716-13>
- Snoeck, C. J., Ducatez, M. F., Owoade, A. A., Faleke, O. O., Alkali, B. R., Tahita, M. C., Tarnagda, Z., Ouedraogo, J. B., Maikano, I., Mbah, P. O., Kremer, J. R., & Muller, C. P. (2009). Newcastle disease virus in West Africa: New virulent strains identified in non-commercial farms. *Archives of Virology*, 154(1), 47–54. <https://doi.org/10.1007/s00705-008-0269-5>
- Snoeck, C. J., Owoade, A. A., Alkali, B. R., Okwen, M. P., Adeniyi, T., Komoyo, G. F., Nakouné, E., Faou, L., & Muller, C. P. (2013). *High Genetic Diversity of Newcastle Disease Virus in Poultry in West and Central Africa : Cocirculation of Genotype XIV and Newly Defined Genotypes XVII and XVIII*. <https://doi.org/10.1128/JCM.00684-13>
- Snoeck, C. J., Owoade, A. A., Couacy-Hymann, E., Alkali, B. R., Okwen, M. P., Adeyanju, A. T., Komoyo, G. F., Nakouné, E., Le Faou, A., & Muller, C. P. (2013). High genetic diversity of newcastle disease virus in poultry in west and central Africa: Cocirculation of genotype XIV and newly defined genotypes XVII and XVIII. *Journal of Clinical Microbiology*, 51(7), 2250–2260. <https://doi.org/10.1128/JCM.00684-13>
- Solomon, P., Bisschop, S., Joannis, T. M., Shittu, I., Meseko, C., Sulaiman, L., Gado, D., Oladokun, A. T., Olawuyi, K. A., & Abolnik, C. (2012). Phylogenetic analysis of Newcastle disease viruses isolated from asymptomatic guinea fowls (*Numida meleagris*) and Muscovy ducks (*Cairina moscata*) in Nigeria. *Tropical Animal Health and Production*, 45(1), 53–57. <https://doi.org/10.1007/s11250-012-0173-6>
- Souley, M. M., Issa Ibrahim, A., Souley Kouato, B., Abdou, A., Issa, R., Yaou, B., Amadou, H., Hama, H., Adakal, H., Abdou, N., Cattoli, G., & Dundon, W. G. (2021). Co-circulation of genotypes XIV.2 and XVIII.2 of avian paramyxovirus-1 (Newcastle disease virus) in backyard poultry in Niger. *Virus Genes*, 57(1), 100–105. <https://doi.org/10.1007/s11262-020-01804-x>
- van Borm, S., Obishakin, E., Joannis, T., Lambrecht, B., & van den Berg, T. (2012). Further evidence for the widespread co-circulation of lineages 4b and 7 velogenic Newcastle disease viruses in rural Nigeria. *Avian Pathology*, 41(4), 377–382. <https://doi.org/10.1080/03079457.2012.696311>
- Welch, C. N., Shittu, I., Abolnik, C., Solomon, P., Dimitrov, K. M., Taylor, T. L., Williams-Coplin, D., Goraichuk, I. V., Meseko, C. A., Ibu, J. O., Gado, D. A., Joannis, T. M., & Afonso, C. L. (2019). Genomic comparison of Newcastle disease viruses isolated in Nigeria between 2002 and 2015 reveals circulation of highly diverse genotypes and spillover into wild birds. *Archives of Virology*, 164(8), 2031–2047. <https://doi.org/10.1007/s00705-019->

04288-9
