# Supplementary material for: Genomic Diversity and Geographic Distribution of Newcastle Disease Virus Genotypes in Africa: Implications for Diagnosis, Vaccination, and Regional Collaboration
Source: MDPI journal article supplement (doi:10.3390/v16050795), 2024-05-16
Supplement: s1 [file s1]

**Table S4: Distribution of class II NDV genotypes in Central Africa**

| Country                          | Paper | Isolate GenBank accession number | Genotype    | Year of collection | Country                          | Isolate name                                    | Reference              |
|----------------------------------|-------|----------------------------------|-------------|--------------------|----------------------------------|-------------------------------------------------|------------------------|
| Cameroon                         | 1     | FJ772484                         | XVII        | 2008               | Cameroon                         | Cameroon/3490-147/2008                          | (Cattoli et al., 2010) |
|                                  |       | FJ772478                         | XVII        | 2008               | Cameroon                         | chicken-3490-149-Cameroon-2008                  |                        |
|                                  | 2     | HF969159                         | I           | 2011               | Cameroon                         | chicken/Cameroon/CAE11-855/2011                 | (Snoeck et al., 2013)  |
| Central African Republic         | 1     | HF969125                         | XVII        | 2008               | Central African Republic         | chicken/Central African Republic/CAF09-014/2008 | (Snoeck et al., 2013)  |
|                                  |       | HF969181                         | XVII        | 2008               | Central African Republic         | chicken/Central African Republic/CAF09-015/2008 |                        |
|                                  |       | HF969182                         | XVII        | 2008               | Central African Republic         | chicken/Central African Republic/CAF09-016/2008 |                        |
| Democratic Republic of the Congo | 1     | MW363929                         | New variant | 2018               | Democratic Republic of the Congo | NDV/Ck/DRC/18VIR3696/2018                       | (Twabela et al., 2021) |
|                                  |       | MW363930                         | New variant | 2018               | Democratic Republic of the Congo | NDV/Ck/DRC/PL33/2018                            |                        |
|                                  |       | MW363931                         | VII.2       | 2019               | Democratic Republic of the Congo | NDV/Ck/DRC/PL219/2019                           |                        |

## References

- Cattoli, G., Fusaro, A., Monne, I., Molia, S., Le Menach, A., Maregeya, B., Nchare, A., Bangana, I., Maina, A. G., N’Goran Koffi, J. N., Thiam, H., Bezeid, O. E. M. A., Salviato, A., Nisi, R., Terregino, C., & Capua, I. (2010). Emergence of a new genetic lineage of Newcastle disease virus in West and Central Africa-Implications for diagnosis and control. *Veterinary Microbiology*, 142(3–4), 168–176. <https://doi.org/10.1016/j.vetmic.2009.09.063>
- Snoeck, C. J., Owoade, A. A., Couacy-Hymann, E., Alkali, B. R., Okwen, M. P., Adeyanju, A. T., Komoyo, G. F., Nakouné, E., Le Faou, A., & Muller, C. P. (2013). High genetic diversity of newcastle disease virus in poultry in west and central Africa: Cocirculation of genotype XIV and newly defined genotypes XVII and XVIII. *Journal of Clinical Microbiology*, 51(7), 2250–2260. <https://doi.org/10.1128/JCM.00684-13>
- Twabela, A. T., Nguyen, L. T., Masumu, J., Mpoyo, P., Mpiana, S., Sumbu, J., Okamatsu, M., Matsuno, K., Isoda, N., Zecchin, B., Monne, I., & Sakoda, Y. (2021). A new variant among newcastle disease viruses isolated in the democratic republic of the congo in 2018 and 2019. *Viruses*, 13(2), 1–11. <https://doi.org/10.3390/v13020151>
