# Supplementary material for: Genomic Diversity and Geographic Distribution of Newcastle Disease Virus Genotypes in Africa: Implications for Diagnosis, Vaccination, and Regional Collaboration
Source: MDPI journal article supplement (doi:10.3390/v16050795), 2024-05-16
Supplement: s1 [file s1]

**Table S5: Distribution of class II NDV genotypes in Northern Africa**

| Country | Paper             | Isolate GenBank accession number | Geno type  | Year of collection | Country | Isolate name              | Reference                          |
|---------|-------------------|----------------------------------|------------|--------------------|---------|---------------------------|------------------------------------|
| Egypt   | 1<br>(UNVERIFIED) | KU377781                         | VII<br>1.1 | 2015               | Egypt   | NDV/ EG/CH/ 18/2015       | (Abd El Aziz <i>et al.</i> , 2016) |
|         |                   | KU377782                         | VII<br>1.1 | 2015               | Egypt   | NDV/EG/CH/24/2014         |                                    |
|         |                   | KU377783                         | VII<br>1.1 | 2015               | Egypt   | NDV/EG/CH/26/2014         |                                    |
|         |                   | KU377784                         | VII<br>1.1 | 2015               | Egypt   | NDV /EG/ CH/ 35/ 2014     |                                    |
|         | 2                 | FJ939313                         | II         | 2005               | Egypt   | NDV/Chicken/Egypt/1/2005  | (Mohamed <i>et al.</i> , 2009)     |
|         | 3                 | JX504077                         | VII<br>1.1 | 2012               | Egypt   | NDV/Egy/SH03/2012         | (Abdel-Glil <i>et al.</i> , 2014)  |
|         |                   | JX504078                         | VII<br>1.1 | 2012               | Egypt   | NDV/Egy/SH02/2012         |                                    |
|         |                   | JX504079                         | VII<br>1.1 | 2012               | Egypt   | NDV/Egy/SH04/2012         |                                    |
|         |                   | JX504080                         | VII<br>1.1 | 2012               | Egypt   | NDV/Egy/SH01/2012         |                                    |
|         | 4                 | MK604197                         | VII        | 2015               | Egypt   | NDV-EGYPT/1516F-2015      | (Zanaty <i>et al.</i> , 2019)      |
|         |                   | MK604198                         | VII        | 2015               | Egypt   | NDV-EGYPT/151309F-2015    |                                    |
|         |                   | MK604199                         | VII        | 2015               | Egypt   | NDV-EGYPT/15492F-2015     |                                    |
|         |                   | MK604200                         | VII        | 2015               | Egypt   | NDV-EGYPT/15986F-2015     |                                    |
|         |                   | MK604201                         | VII        | 2015               | Egypt   | NDV-EGYPT/15158F-2015     |                                    |
|         |                   | MK604202                         | VII        | 2016               | Egypt   | NDV-EGYPT/16280F-2016     |                                    |
|         |                   | MK604203                         | VII        | 2016               | Egypt   | NDV-EGYPT/16261F-2016     |                                    |
|         |                   | MK604204                         | VII        | 2016               | Egypt   | NDV-EGYPT/16553F-2016     |                                    |
|         |                   | MK604205                         | II         | 2016               | Egypt   | NDV-EGYPT/1610CV-2016     |                                    |
|         |                   | MK604206                         | VII        | 2016               | Egypt   | NDV-EGYPT/161158F-2016    |                                    |
|         |                   | MK604207                         | VII        | 2017               | Egypt   | NDV-EGYPT/17295F-2017     |                                    |
|         |                   | MK604208                         | VII        | 2017               | Egypt   | NDV-EGYPT/17273F-2017     |                                    |
|         |                   | MK604209                         | VII        | 2017               | Egypt   | NDV-EGYPT/171014F-14-2017 |                                    |
|         |                   | MK604210                         | VII        | 2017               | Egypt   | NDV-EGYPT/171014F-15-2017 |                                    |
|         |                   | MK604211                         | VII        | 2017               | Egypt   | NDV-EGYPT/171014F-16-2017 |                                    |
|         |                   | MK604212                         | II         | 2017               | Egypt   | NDV-EGYPT/17140F/S-2017   |                                    |
|         |                   | MK604213                         | II         | 2017               | Egypt   | NDV-EGYPT/17151F/S-2017   |                                    |
|         |                   | MK604214                         | II         | 2018               | Egypt   | NDV-EGYPT/18156F/S-2018   |                                    |
|         |                   | MK604215                         | I          | 2018               | Egypt   | NDV-EGYPT/18246F/S-2018   |                                    |

|  |   |          |         |      |       |                                    |                                |
|--|---|----------|---------|------|-------|------------------------------------|--------------------------------|
|  |   | MK604216 | VII     | 2018 | Egypt | NDV-EGYPT/181210F-2018             |                                |
|  |   | MK604217 | VII     | 2018 | Egypt | NDV-EGYPT/18734F-2018              |                                |
|  |   | MK604218 | VII     | 2018 | Egypt | NDV-EGYPT/18403F-2018              |                                |
|  |   | MK604219 | VII     | 2018 | Egypt | NDV-EGYPT/18629F-2018              |                                |
|  |   | MK604220 | VII     | 2018 | Egypt | NDV-EGYPT/18238F-2018              |                                |
|  |   | MK604221 | VII     | 2018 | Egypt | NDV-EGYPT/1890FI-2018              |                                |
|  | 5 | KY075880 | VII.1.1 | 2016 | Egypt | NDV/chicken/Egypt/Sharkia7/2016    | (Orabi <i>et al.</i> , 2017)   |
|  |   | KY075881 | VII.1.1 | 2016 | Egypt | NDV/chicken/Egypt/Ismailia8/2016   |                                |
|  |   | KY075882 | VII.1.1 | 2016 | Egypt | NDV/chicken/Egypt/Damietta9/2016   |                                |
|  |   | KY075883 | VII.1.1 | 2016 | Egypt | NDV/chicken/Egypt/Sharkia10/2016   |                                |
|  |   | KY075884 | VII.1.1 | 2016 | Egypt | NDV/chicken/Egypt/Qualyobia11/2016 |                                |
|  |   | KY075885 | VII.1.1 | 2016 | Egypt | NDV/chicken/Egypt/Qualyobia12/2016 |                                |
|  |   | KY075886 | VII.1.1 | 2016 | Egypt | NDV/chicken/Egypt/Sharkia14/2016   |                                |
|  |   | KY075887 | VII.1.1 | 2016 | Egypt | NDV/chicken/Egypt/El-Arish15/2016  |                                |
|  |   | KY075888 | VII.1.1 | 2016 | Egypt | NDV/chicken/Egypt/El-Arish16/2016  |                                |
|  |   | KY075889 | VII.1.1 | 2016 | Egypt | NDV/chicken/Egypt/Qualyobia26/2016 |                                |
|  |   | KY075890 | VII.1.1 | 2016 | Egypt | NDV/chicken/Egypt/Dakhlia27/2016   |                                |
|  |   | KY075891 | VII.1.1 | 2016 | Egypt | NDV/chicken/Egypt/Dakhlia28/2016   |                                |
|  |   | KY075892 | VII.1.1 | 2016 | Egypt | NDV/chicken/Egypt/Ismailia29/2016  |                                |
|  |   | KY075893 | VII.1.1 | 2016 | Egypt | NDV/chicken/Egypt/Dakhlia30/2016   |                                |
|  |   | KY075894 | VII.1.1 | 2016 | Egypt | NDV/chicken/Egypt/Dakhlia31/2016   |                                |
|  |   | KY075895 | VII.1.1 | 2016 | Egypt | NDV/chicken/Egypt/Ismailia32/2016  |                                |
|  | 6 | KX231852 | VII.1.1 | 2015 | Egypt | NDV/chicken/Egypt/1/2015           | (Megahed <i>et al.</i> , 2018) |
|  |   | KX231853 | VII.1.1 | 2015 | Egypt | NDV/chicken/Egypt/2/2015           |                                |
|  |   | KX231851 | VII.1.1 | 2015 | Egypt | NDV/chicken/Egypt/3/2015           |                                |
|  |   | KX231854 | VII.1.1 | 2015 | Egypt | NDV/chicken/Egypt/4/2015           |                                |
|  | 7 | MN905162 | VII.1.1 | 2019 | Egypt | NDV Giza S4                        | (Shakal <i>et al.</i> , 2020)  |
|  | 8 | MF418017 | VII     | 2007 | Egypt | NDV/Chicken/EG-MN/NRC/2015         | (Ahmed <i>et al.</i> , 2017)   |
|  |   | MF418018 | VII     | 2007 | Egypt | NDV/Chicken/EG-QU/NRC/2015         |                                |
|  |   | MF418019 | VII     | 2007 | Egypt | NDV/Chicken/EG-SH/NRC/2015         |                                |

|  |           |          |             |      |       |                                            |                                    |
|--|-----------|----------|-------------|------|-------|--------------------------------------------|------------------------------------|
|  |           | MF418020 | VII         | 2007 | Egypt | NDV/Chicken/EG -SH2/<br>NR/2015            |                                    |
|  | <b>9</b>  | MG966505 | VII.1.<br>1 | 2014 | Egypt | NDV/CHICKEN/EGYPT/48<br>Ob/NRC-CU/2014     | (Amer, 2018)                       |
|  |           | MG966506 | VII.1.<br>1 | 2014 | Egypt | NDV/CHICKEN/EGYPT/66<br>Oc/NRC/2014        |                                    |
|  | <b>10</b> | MN137989 | VII.1.<br>1 | 2019 | Egypt | NDV/EG-Q/Ch/6/2019                         | (Desouky <i>et al.</i> ,<br>2020)  |
|  |           | MN137990 | VII.1.<br>1 | 2018 | Egypt | NDV/EG-Q/Ch/31/2018                        |                                    |
|  |           | MN137991 | VII.1.<br>1 | 2018 | Egypt | NDV/EG-Q/Ch/11/2018                        |                                    |
|  |           | MN137992 | VII.1.<br>1 | 2019 | Egypt | NDV/EG-Q/Ch/47/2019                        |                                    |
|  |           | MN458502 | VII.1.<br>1 | 2019 | Egypt | NDV/EG-Q/Ch/4/2019                         |                                    |
|  |           | MN458503 | VII.1.<br>1 | 2019 | Egypt | NDV/EG-Q/Ch/5/2019                         |                                    |
|  |           | MN458504 | VII.1.<br>1 | 2018 | Egypt | NDV/EG-Q/Ch/9/2018                         |                                    |
|  |           | MN458505 | VII.1.<br>1 | 2018 | Egypt | NDV/EG-Q/Ch/12/2018                        |                                    |
|  | <b>11</b> | JX173098 | VII.1.<br>1 | 2012 | Egypt | NDV/Chicken/Giza/Egypt/<br>MRO/2012        | (Radwan <i>et al.</i> ,<br>2013)   |
|  |           | JX193771 | II          | 2012 | Egypt | NDV/Chicken/Behaira/Egy<br>pt/MR6/2012     |                                    |
|  |           | JX193772 | II          | 2011 | Egypt | NDV/Chicken/<br>Fayoum/Egypt/MR7/2011      |                                    |
|  | <b>12</b> | MHO78055 | VII.1.<br>1 | 2016 | Egypt | NDV-ch-EG-CLEVB-F604-<br>2016              | (Monir <i>et al.</i> ,<br>2018)    |
|  | <b>13</b> | MT878465 | VII.1.<br>1 | 2017 | Egypt | Cattle_egret/Egypt/KFS-<br>Elhamoul-1/2017 | (Abd Elfatah <i>et al.</i> , 2021) |
|  |           | MT878466 | VII.1.<br>1 | 2018 | Egypt | Cattle_egret/Egypt/KFS-<br>Motobas-2/2018  |                                    |
|  |           | MT878467 | VII.1.<br>1 | 2017 | Egypt | Sparrow/Egypt/KFS-<br>Elhamoul-3/2017      |                                    |
|  | <b>14</b> | MK495878 | VII.1.<br>1 | 2011 | Egypt | NDV/Egypt/Luxor/2011/1                     | (Tran <i>et al.</i> , 2020)        |
|  |           | MK495879 | VII.1.<br>1 | 2011 | Egypt | NDV/Egypt/Luxor/2011/2                     |                                    |
|  |           | MK495883 | VII.1.<br>1 | 2012 | Egypt | NDV/Egypt/Luxor/2012/2                     |                                    |
|  |           | MK495884 | VII.1.<br>1 | 2012 | Egypt | NDV/Egypt/Luxor/2012/3                     |                                    |
|  |           | MK495885 | VII.1.<br>1 | 2012 | Egypt | NDV/Egypt/Luxor/2012/4                     |                                    |
|  |           | MK495886 | VII.1.<br>1 | 2012 | Egypt | NDV/Egypt/Luxor/2012/5                     |                                    |
|  |           | MK495887 | VII.1.<br>1 | 2012 | Egypt | NDV/Egypt/Luxor/2012/7                     |                                    |
|  |           | MK495906 | VII.1.<br>1 | 2012 | Egypt | NDV/Egypt/Qena/2012/2                      |                                    |
|  |           | MK495909 | VII.1.<br>1 | 2013 | Egypt | NDV/Egypt/Aswan/2013/<br>1                 |                                    |
|  |           | MK495910 | VII.1.<br>1 | 2013 | Egypt | NDV/Egypt/Luxor/2013/1                     |                                    |

|  |           |          |         |      |       |                           |                                     |
|--|-----------|----------|---------|------|-------|---------------------------|-------------------------------------|
|  | <b>15</b> | KY693681 | VII.1.1 | 2014 | Egypt | VNDV/CK/EG/VIR-SHABS/2014 | (Ewies <i>et al.</i> , 2017)        |
|  |           | KY693682 | VII.1.1 | 2014 | Egypt | NDV/CK/EG/VIR-MMBS/2014   |                                     |
|  |           | KY693683 | VII.1.1 | 2016 | Egypt | VNDV/CK/EG/VIR-FAY02/2016 |                                     |
|  |           | KY693684 | VII.1.1 | 2016 | Egypt | VNDV/CK/EG/VIR-B.S01/2016 |                                     |
|  | <b>16</b> | AB871426 | VII.1.1 | 2011 | Egypt | NDV/EG/CK/13/11           | (Sultan <i>et al.</i> , 2015)       |
|  |           | AB871425 | VII.1.1 | 2011 | Egypt | NDV/EG/CK/20/11           |                                     |
|  |           | AB871428 | VII.1.1 | 2011 | Egypt | NDV/EG/CK/67/11           |                                     |
|  |           | AB871422 | VII.1.1 | 2011 | Egypt | NDV/EG/CK/83/11           |                                     |
|  |           | AB871427 | VII.1.1 | 2012 | Egypt | NDV/EG/CK/101/12          |                                     |
|  |           | AB871423 | VII.1.1 | 2012 | Egypt | NDV/EG/CK/129/12          |                                     |
|  |           | AB863742 | VII.1.1 | 2012 | Egypt | NDV/EG/CK/135/12          |                                     |
|  |           | AB871424 | VII.1.1 | 2012 | Egypt | NDV/EG/CK/146/12          |                                     |
|  | <b>17</b> | MH445410 | VII.1.1 | 2015 | Egypt | NDV-Egypt-18-2015         | (Abd El-Hamid <i>et al.</i> , 2020) |
|  |           | MN519688 | VII.1.1 | 2017 | Egypt | NDV/Egypt/Ch/MR89/2017    |                                     |
|  |           | MK984236 | VII.1.1 | 2017 | Egypt | NDV/Egypt/Ch/B36-F0/2017  |                                     |
|  |           | MK984237 | VII.1.1 | 2018 | Egypt | NDV/Egypt/Ch/D30-F0/2018  |                                     |
|  |           | MN519690 | VII.1.1 | 2018 | Egypt | NDV/Egypt/Ch/MH6/2018     |                                     |
|  |           | MN519692 | VII.1.1 | 2018 | Egypt | NDV/Egypt/Ch/MDK3/2018    |                                     |
|  |           | MN519693 | VII.1.1 | 2018 | Egypt | NDV/Egypt/Ch/MQ3/2018     |                                     |
|  |           | MK984238 | VII.1.1 | 2018 | Egypt | NDV/Egypt/Ch/R78-F0/2018  |                                     |
|  |           | MN519689 | VII.1.1 | 2018 | Egypt | NDV/Egypt/Ch/MGhl/2018    |                                     |
|  |           | MN519694 | VII.1.1 | 2018 | Egypt | NDV/Egypt/Ch/MK/2018      |                                     |
|  |           | MN519687 | VII.1.1 | 2018 | Egypt | NDV/Egypt/Ch/MQ4/2018     |                                     |
|  |           | MN519685 | VII.1.1 | 2018 | Egypt | NDV/Egypt/P/MR82/2018     |                                     |
|  |           | MN519686 | VII.1.1 | 2018 | Egypt | NDV/Egypt/P/MR84/2018     |                                     |
|  |           | MN519684 | VII.1.1 | 2019 | Egypt | NDV/Egypt/Ch/MN51/2019    |                                     |
|  | <b>18</b> | FJ969393 | II      | 2006 | Egypt | NDV/chicken/Egypt/2/2006  | (Mohamed <i>et al.</i> , 2011)      |
|  |           | FJ969394 | II      | 2006 | Egypt | NDV/chicken/Egypt/3/2006  |                                     |

|              |           |          |         |      |       |                                        |                                |
|--------------|-----------|----------|---------|------|-------|----------------------------------------|--------------------------------|
|              |           | FJ969395 | II      | 2006 | Egypt | NDV/chicken/Egypt/4/2006               |                                |
|              | <b>19</b> | KM288609 | VII     | 2012 | Egypt | NDV-B7-RLQP-CH-EG-12                   | (Saad <i>et al.</i> , 2017)    |
|              |           | KM288610 | VII     | 2012 | Egypt | NDV-B23-RLQP-CH-EG-12                  |                                |
|              |           | KM288611 | VII     | 2012 | Egypt | NDV-B34-RLQP-CH-EG-12                  |                                |
|              |           | KM288612 | VII     | 2012 | Egypt | NDV-B83-RLQP-CH-EG-12                  |                                |
|              |           | KM288613 | VII     | 2012 | Egypt | NDV-B102-RLQP-CH-EG-12                 |                                |
|              |           | KM288614 | VII     | 2012 | Egypt | NDV-B106-RLQP-CH-EG-12                 |                                |
|              |           | KM288615 | VII     | 2012 | Egypt | NDV-B109-RLQP-CH-EG-12                 |                                |
|              |           | KM288616 | VII     | 2012 | Egypt | NDV-B110-RLQP-CH-EG-12                 |                                |
|              |           | KM288617 | VII     | 2012 | Egypt | NDV-B113-RLQP-CH-EG-12                 |                                |
|              |           | KM288618 | VII     | 2012 | Egypt | NDV-B114-RLQP-CH-EG-12                 |                                |
|              |           | KM288619 | VII     | 2012 | Egypt | NDV-B127-RLQP-CH-EG-12                 |                                |
|              |           | KM288620 | VII     | 2012 | Egypt | NDV-B161-RLQP-CH-EG-12                 |                                |
|              |           | KM288621 | VII     | 2011 | Egypt | NDV-F278-RLQP-CH-EG-11                 |                                |
|              |           | KM288622 | II      | 2012 | Egypt | NDV-B81-RLQP-CH-EG-12                  |                                |
|              |           | KP316015 | VII     | 2013 | Egypt | NDV-F460-RLQP-CH-EG-13                 |                                |
|              |           | KP316016 | VII     | 2014 | Egypt | NDV-F388-RLQP-CH-EG-14                 |                                |
|              |           |          | XXI.1.1 | 2021 | Egypt | Chicken/Egypt/BSU24/2021               | (Abozaid & Abdel-Moneim, 2022) |
| <b>Libya</b> | <b>1</b>  | KP719224 | VII.2   | 2013 | Libya | APMV-1/chicken/Libya/13VIR/7225-1/2013 | (Kammon <i>et al.</i> , 2015)  |
|              | <b>2</b>  |          | VII.2   | 2015 | Libya | APMV1/Libya/15VIR5368/2015             | (Kammon <i>et al.</i> , 2018)  |
|              |           |          | VII.2   | 2015 | Libya | APMV1/Libya/15VIR5371/2015             |                                |
|              |           |          | VI.1.1  | 2015 | Libya | APMV1/Libya/15VIR5369/2015             |                                |

## References

- Abd El-Hamid, H. S., Shafi, M. E., Albaqami, N. M., Ellakany, H. F., Abdelaziz, N. M., Abdelaziz, M. N., Abd El-Hack, M. E., Taha, A. E., Alanazi, K. M., & Elbestawy, A. R. (2020). Sequence analysis and pathogenicity of Avian Orthoavulavirus 1 strains isolated from poultry flocks during 2015-2019. *BMC Veterinary Research*, 16(1), 1–15. <https://doi.org/10.1186/s12917-020-02470-9>
- Abd El Aziz, M., Abd El-Hamid, H., Ellkany, H., Nasef, S., Nasr, S., & El Bestawy, A. (2016). Biological and Molecular Characterization of Newcastle Disease Virus Circulating in Chicken Flocks, Egypt, During 2014-2015. *Journal, Zagazig Veterinary*, 44(1), 9–20. <https://doi.org/10.21608/zvjz.2016.7827.Biological>

- Abd Elfatah, K. S., Elabasy, M. A., El-Khyate, F., Elmahallawy, E. K., Mosad, S. M., El-Gohary, F. A., Abdo, W., Al-Brakati, A., Seadawy, M. G., Tahoon, A. E., & El-Gohary, A. E. (2021). Molecular characterization of velogenic newcastle disease virus (Sub-genotype vii.1.1) from wild birds, with assessment of its pathogenicity in susceptible chickens. *Animals*, 11(2), 1–20. <https://doi.org/10.3390/ani11020505>
- Abdel-Glil, M. Y., Mor, S. K., Sharafeldin, T. A., Porter, R. E., & Goyal, S. M. (2014). Detection and characterization of Newcastle disease virus in formalin-fixed, paraffin-embedded tissues from commercial broilers in Egypt. *Avian Diseases*, 58(1), 118–123. <https://doi.org/10.1637/10616-071813-Reg.1>
- Abozaid, K. G. A., & Abdel-Moneim, A. S. (2022). Epidemiological surveillance of Newcastle disease virus in Egypt — a 6-year cohort study. *Tropical Animal Health and Production*, 54(4). <https://doi.org/10.1007/s11250-022-03234-3>
- Ahmed, H. M., Amer, M. M., El-bayoumi, K., Amer, S. A., & Kutkat, M. A. E. A. (2017). Identification and sequencing of Genotype VII of Newcastle disease virus from chicken flocks in six Egyptian Governorates. *Egyptian Journal of Veterinary Sciences*, 48(1), 31–41. <https://doi.org/10.21608/EJVS.2017.1236.1015>
- Amer, M. (2018). Isolation and Identification of H9N2 influenza and Newcastle disease viruses co-infections in chicken. *Egyptian Journal of Veterinary Sciences*, 0(0), 0–0. <https://doi.org/10.21608/ejvs.2018.4963.1043>
- Desouky, A., Saad, A., Elshorbagy, M., & Abodalal, S. (2020). Isolation and Identification Of New Sub-Genotypes Of Virulent ND Virus In Broiler Chickens In Qalybia Governorate. *Benha Veterinary Medical Journal*, 39(1), 159–164. <https://doi.org/10.21608/bvmj.2020.32932.1216>
- Ewies, S. S., Ali, A., Tamam, S. M., & Madbouly, H. M. (2017). Molecular characterization of Newcastle disease virus (genotype VII) from broiler chickens in Egypt. *Beni-Suef University Journal of Basic and Applied Sciences*, 6(3), 232–237. <https://doi.org/10.1016/j.bjbas.2017.04.004>
- Kammon, A., Heidari, A., Dayhum, A., Eldaghayes, I., Sharif, M., Monne, I., Cattoli, G., Asheg, A., Farhat, M., & Kraim, E. (2015). Characterization of Avian Influenza and Newcastle Disease Viruses from Poultry in Libya. *Avian Diseases*, 59(3), 422–430. <https://doi.org/10.1637/11068-032215-ResNote.1>
- Kammon, A., Monne, I., Asheg, A., & Cattoli, G. (2018). Molecular detection and characterisation of avian paramyxovirus type 1 in backyard chickens and pigeons in Alzintan city of Libya. *Open Veterinary Journal*, 8(4), 401–405. <https://doi.org/10.4314/ovj.v8i4.8>
- Megahed, M. M., Eid, A. A. M., Mohamed, W., & Hassanin, O. (2018). Genetic characterization of egyptian newcastle disease virus strains isolated from flocks vaccinated against newcastle disease virus, 2014-2015. *Slovenian Veterinary Research*, 55(Suppl 20), 17–29. <https://doi.org/10.26873/SVR-623-2018>
- Mohamed, M. H. A., Kumar, S., Paldurai, A., Megahed, M. M., Ghanem, I. A., LebDAH, M. A., & Samal, S. K. (2009). Complete genome sequence of a virulent Newcastle disease virus

isolated from an outbreak in chickens in Egypt. *Virus Genes*, 39(2), 234–237.  
<https://doi.org/10.1007/S11262-009-0385-7>

Mohamed, M. H. A., Kumar, S., Paldurai, A., Samal, S. K., MH, M., S, K., A, P., & SK, S. (2011). Sequence analysis of fusion protein gene of Newcastle disease virus isolated from outbreaks in Egypt during 2006. *Virology Journal*, 8(1), 237. <https://doi.org/10.1186/1743-422X-8-237>

Monir, N., Omar, L., El-Bagoury, G., Sharawi, S., & A., A. (2018). Isolation and Molecular Identification of Avian Paramyxovirus-1 from Broiler Outbreak in Qaliobia Governorate, Egypt. *Benha Veterinary Medical Journal*, 34(2), 265–277.  
<https://doi.org/10.21608/bvmj.2018.29437>

Orabi, A., Hussein, A., Saleh, A. A., El-Magd, M. A., & Munir, M. (2017). Evolutionary insights into the fusion protein of Newcastle disease virus isolated from vaccinated chickens in 2016 in Egypt. *Archives of Virology*, 162(10), 3069–3079. <https://doi.org/10.1007/s00705-017-3483-1>

Radwan, M. M., Darwish, S. F., El-Sabagh, I. M., El-Sanousi, A. A., & Shalaby, M. A. (2013). Isolation and molecular characterization of Newcastle disease virus genotypes II and VIId in Egypt between 2011 and 2012. *Virus Genes*, 47(2), 311–316.  
<https://doi.org/10.1007/s11262-013-0950-y>

Saad, A. M., Samy, A., Soliman, M. A., Arafa, A., Zanaty, A., Hassan, M. K., Sultan, A. H., Bazid, A. I., & Hussein, A. H. (2017). Genotypic and pathogenic characterization of genotype VII Newcastle disease viruses isolated from commercial farms in Egypt and evaluation of heterologous antibody responses. *Archives of Virology*, 162(7), 1985–1994.  
<https://doi.org/10.1007/s00705-017-3336-y>

Shakal, M., Maher, M., Metwally, A. S., AbdelSabour, M. A., Madbbouly, Y. M., & Safwat, G. (2020). Molecular Identification of a Velogenic Newcastle Disease Virus Strain Isolated from Egypt. *Journal of World's Poultry Research*, 10, 195–205.  
<https://doi.org/10.36380/JWPR.2020.25>

Sultan, S., Osman, N., Ahmed, A. I., Ibrahim, R. S., & Sabra, M. (2015). Phylogenetic Characterization of Velogenic Newcastle Disease Viruses Isolated From Field Outbreaks Among Vaccinated Broiler Chickens in Upper Egypt. *Assiut Veterinary Medical Journal*, 61(145), 126–135. <https://doi.org/10.21608/avmj.2015.170195>

Tran, G. T. H., Sultan, S., Osman, N., Hassan, M. I., VAN DONG, H., Dao, T. D., Omatsu, T., Katayama, Y., Mizutani, T., Takeda, Y., Ogawa, H., & Imai, K. (2020). Molecular characterization of full genome sequences of newcastle disease viruses circulating among vaccinated chickens in Egypt during 2011–2013. *Journal of Veterinary Medical Science*, 82(6), 809–816. <https://doi.org/10.1292/jvms.19-0623>

Zanaty, A. M., Hagag, N. M., Rabie, N., Selim, M. S. K., Mousa, S. A., Shalaby, A. G., Arafa, A.-S., & Hassan, M. K. (2019). Epidemiological, Phylogenetic Analysis and Pathogenicity of Newcastle Disease Virus Circulating in Poultry Farms, Egypt during 2015-2018. *Hosts and Viruses*, 6(3). <https://doi.org/10.17582/journal.hv/2019/6.3.50.59>
