# Supplementary material for: Genomic Diversity and Geographic Distribution of Newcastle Disease Virus Genotypes in Africa: Implications for Diagnosis, Vaccination, and Regional Collaboration
Source: MDPI journal article supplement (doi:10.3390/v16050795), 2024-05-16
Supplement: s1 [file s1]

**Table S1: Distribution of class II NDV genotypes in Eastern Africa**

| Country  | Paper | Isolate GenBank accession number | Genotype | Year of collection | Country  | Isolate name                                 | Reference                       |
|----------|-------|----------------------------------|----------|--------------------|----------|----------------------------------------------|---------------------------------|
| Tanzania | 1     | AY 175653                        | V        | 1995               | Tanzania | AV 1300/95 MG-10-04-CTanzania                | (Aldous <i>et al.</i> , 2003)   |
|          |       | AY 175654                        | V        | 1995               | Tanzania | AV 1300/95 MG-10-05-CTanzania                |                                 |
|          |       | AY 175655                        | XX       | 1995               | Tanzania | AV 1300/95 TB-02-13-GTanzania                |                                 |
|          |       | AY 175656                        | V        | 1995               | Tanzania | AV 1300/95 TB-02-24-DTanzania                |                                 |
|          |       | AY 175728                        | V        | 1995               | Tanzania | AV 1300/95 MG-04-08CTanzania                 |                                 |
|          | 2     | MT335727                         | V        | 2011               | Tanzania | VirMagerHatch/chicken/Morogoro/Tanzania/2011 | (da Silva <i>et al.</i> , 2020) |
|          |       | MT335728                         | V        | 2014               | Tanzania | 9583/chicken/Morogoro/Tanzania/2014          |                                 |
|          |       | MT335729                         | XIII1.1  | 2014               | Tanzania | 6094/chicken/Morogoro/Tanzania/2014          |                                 |
|          |       | MT335730                         | XIII1.1  | 2014               | Tanzania | 9600/chicken/Morogoro/Tanzania/2014          |                                 |
|          |       | MT335731                         | XIII1.1  | 2014               | Tanzania | 9676/chicken/Morogoro/Tanzania/2014          |                                 |
|          |       | MT335732                         | XIII1.1  | 2014               | Tanzania | 9581/chicken/Morogoro/Tanzania/2014          |                                 |
|          |       | MT335733                         | V        | 2014               | Tanzania | 30Hatch/chicken/Morogoro/Tanzania/2014       |                                 |
|          |       | MT335734                         | XIII1.1  | 2016               | Tanzania | 9206/chicken/Morogoro/Tanzania/2016          |                                 |
|          |       | MT335735                         | V        | 2016               | Tanzania | 208/chicken/Morogoro/Tanzania/2016           |                                 |
|          |       | MT335736                         | V        | 2016               | Tanzania | 6467/chicken/Morogoro/Tanzania/2016          |                                 |

|  |          |          |          |      |          |                                         |                                  |
|--|----------|----------|----------|------|----------|-----------------------------------------|----------------------------------|
|  |          | MT335737 | V        | 2016 | Tanzania | 9455/chicken/Morogoro/Tanzania/2016     |                                  |
|  |          | MT335738 | XIII1.1  | 2016 | Tanzania | 9261/chicken/Morogoro/Tanzania/2016     |                                  |
|  |          | MT335739 | XIII1.1  | 2016 | Tanzania | 8037/chicken/Morogoro/Tanzania/2016     |                                  |
|  |          | MT335740 | V        | 2016 | Tanzania | 9443/chicken/Morogoro/Tanzania/2016     |                                  |
|  |          | MT335741 | XIII1.1  | 2016 | Tanzania | 189/chicken/Morogoro/Tanzania/2016      |                                  |
|  |          | MT335742 | XIII1.1  | 2016 | Tanzania | 525/chicken/Morogoro/Tanzania/2016      |                                  |
|  |          | MT335743 | V        | 2016 | Tanzania | 320-2719/chicken/Morogoro/Tanzania/2016 |                                  |
|  |          | MT335744 | XIII1.1  | 2016 | Tanzania | 9334/chicken/Morogoro/Tanzania/2016     |                                  |
|  |          | MT335745 | XIII1.1  | 2016 | Tanzania | 8659/chicken/Morogoro/Tanzania/2016     |                                  |
|  |          | MT335746 | XIII1.1  | 2016 | Tanzania | 9381-131/chicken/Morogoro/Tanzania/2016 |                                  |
|  |          | MT335747 | XIII1.1  | 2017 | Tanzania | 10Vac/chicken/Morogoro/Tanzania/2017    |                                  |
|  |          | MT335748 | XIII1.1  | 2017 | Tanzania | 11Vac/chicken/Morogoro/Tanzania/2017    |                                  |
|  |          | MT335749 | VII.2    | 2012 | Tanzania | Mw13/chicken/Mwanza/Tanzania/2012       |                                  |
|  |          | MT335750 | XIII1.1  | 2012 | Tanzania | Mt07/chicken/Mtwara/Tanzania/2012       |                                  |
|  | <b>3</b> | MK583011 | V        | 2012 | Tanzania | chicken/Tanzania/Mbeya/ MT15/2012       | (Goraichuk <i>et al.</i> , 2019) |
|  | <b>4</b> | MW147368 | VII      | 2020 | Tanzania | NDV/Chicken/Tanzania/Iringa/2020        | (Kibasa, 2020)                   |
|  | <b>5</b> | MK633932 | XIII 1.1 | 2012 | Tanzania | APMV-1/Chicken/Tanzania-Mbeya/MS1/2012  | (Msoffe <i>et al.</i> , 2019)    |

|  |  |          |          |      |          |                                          |  |
|--|--|----------|----------|------|----------|------------------------------------------|--|
|  |  | MK633934 | XIII 1.1 | 2012 | Tanzania | APMV-1/chicken/Tanzania-Iringa/IC20/2012 |  |
|  |  | MK633935 | XIII 1.1 | 2012 | Tanzania | APMV-1/chicken/Tanzania-Iringa/IM40/2012 |  |
|  |  | MK633937 | XIII 1.1 | 2012 | Tanzania | APMV-1/chicken/Tanzania-Arusha/AC31/2012 |  |
|  |  | MK633945 | V        | 2012 | Tanzania | APMV-1/chicken/Tanzania-Arusha/AC56/2012 |  |
|  |  | MK633941 | XIII 1.1 | 2012 | Tanzania | APMV-1/chicken/Tanzania-Tanga/N71/2012   |  |
|  |  | MK633938 | XIII 1.1 | 2012 | Tanzania | APMV-1/chicken/Tanzania-Arusha/AK5/2012  |  |
|  |  | MK633936 | XIII 1.1 | 2012 | Tanzania | APMV-1/chicken/Tanzania-Arusha/AC11/2012 |  |
|  |  | MK633942 | XIII 1.1 | 2012 | Tanzania | APMV-1/chicken/Tanzania-Arusha/AC12/2012 |  |
|  |  | MK633939 | XIII 1.1 | 2012 | Tanzania | APMV-1/chicken/Tanzania-Arusha/AC41/2012 |  |
|  |  | MK633940 | XIII 1.1 | 2012 | Tanzania | APMV-1/chicken/Tanzania-Arusha/AC42/2012 |  |
|  |  | MK633944 | XIII 1.1 | 2012 | Tanzania | APMV-1/chicken/Tanzania-Arusha/AC53/2012 |  |
|  |  | MK633946 | XIII 1.1 | 2012 | Tanzania | APMV-1/chicken/Tanzania-Arusha/AK3/2012  |  |
|  |  | MK633947 | XIII 1.1 | 2012 | Tanzania | APMV-1/chicken/Tanzania-Arusha/AK8/2012  |  |
|  |  | MK633948 | XIII 1.1 | 2012 | Tanzania | APMV-1/chicken/Tanzania-Arusha/A18/2012  |  |
|  |  | MK633933 | XIII 1.1 | 2012 | Tanzania | APMV-1/chicken/Tanzania-Mbeya/MT1/2012   |  |
|  |  | MK633951 | XIII 1.1 | 2012 | Tanzania | APMV-1/chicken/Tanzania-Tanga/N1/2012    |  |
|  |  | MK633952 | XIII 1.1 | 2012 | Tanzania | APMV-1/chicken/Tanzania-Tanga/N6/2012    |  |

|  |          |          |          |      |          |                                                 |                                |
|--|----------|----------|----------|------|----------|-------------------------------------------------|--------------------------------|
|  |          | MK633953 | XIII 1.1 | 2012 | Tanzania | APMV-1/chicken/Tanzania-Tanga/N34/2012          |                                |
|  |          | MK633954 | XIII 1.1 | 2012 | Tanzania | APMV-1/chicken/Tanzania-Tanga/N38/2012          |                                |
|  |          | MK633955 | XIII 1.1 | 2012 | Tanzania | APMV-1/chicken/Tanzania-Tanga/N41/2012          |                                |
|  |          | MK633956 | XIII 1.1 | 2012 | Tanzania | APMV-1/chicken/Tanzania-Tanga/N47/2012          |                                |
|  |          | MK633957 | XIII 1.1 | 2012 | Tanzania | APMV-1/chicken/Tanzania-Tanga/N49/2012          |                                |
|  |          | MK633958 | XIII 1.1 | 2012 | Tanzania | APMV-1/chicken/Tanzania-Tanga/N63/2012          |                                |
|  |          | MK633959 | XIII 1.1 | 2012 | Tanzania | APMV-1/chicken/Tanzania-Tanga/N76/2012          |                                |
|  |          | MK633960 | XIII 1.1 | 2012 | Tanzania | APMV-1/chicken/Tanzania-Tanga/N78/2012          |                                |
|  |          | MK633961 | XIII 1.1 | 2012 | Tanzania | APMV-1/chicken/Tanzania-Tanga/N80/2012          |                                |
|  |          | MK633962 | XIII 1.1 | 2012 | Tanzania | APMV-1/chicken/Tanzania-Tanga/N85/2012          |                                |
|  |          | MK633963 | XIII 1.1 | 2012 | Tanzania | APMV-1/chicken/Tanzania-Tanga/N91/2012          |                                |
|  |          | MK633949 | V        | 2012 | Tanzania | APMV-1/chicken/Tanzania-Dar es Salaam/B280/2012 |                                |
|  |          | MK633950 | V        | 2012 | Tanzania | APMV-1/chicken/Tanzania-Dar es Salaam/K8/2012   |                                |
|  |          | MK633943 | V        | 2012 | Tanzania | APMV-1/chicken/Tanzania-Iringa/IM4/2012         |                                |
|  | <b>6</b> | AY160131 | I        | 1995 | Tanzania | MG6.11C                                         | (Yongolo <i>et al.</i> , 2011) |
|  |          | AY160152 | I        | 1995 | Tanzania | MG7.10C                                         |                                |
|  |          | AY160149 | II       | 1995 | Tanzania | MB9.38C                                         |                                |

|              |          |          |    |      |          |                               |                              |
|--------------|----------|----------|----|------|----------|-------------------------------|------------------------------|
|              |          | FJ713136 | II | 1995 | Tanzania | TB9.18C                       |                              |
|              |          | AY160129 | II | 1995 | Tanzania | MG10.3C                       |                              |
|              |          | AY160145 | II | 1995 | Tanzania | MG1.15C                       |                              |
|              |          | AY160140 | XX | 1995 | Tanzania | MG3.35C                       |                              |
|              |          | AY160154 | XX | 1995 | Tanzania | MG6.30C                       |                              |
|              |          | AY160135 | XX | 1995 | Tanzania | MG6.16C                       |                              |
|              |          | AY160142 | XX | 1995 | Tanzania | MG6.9C                        |                              |
|              |          | AY160141 | V  | 1995 | Tanzania | MG6.28C                       |                              |
|              |          | AY160134 | V  | 1995 | Tanzania | MG2.40C                       |                              |
|              |          | AY160130 | V  | 1995 | Tanzania | MG2.32C                       |                              |
|              |          | AY160139 | V  | 1995 | Tanzania | MG10.5C                       |                              |
| <b>Kenya</b> | <b>1</b> | KY007043 | V  | 2015 | Kenya    | NDV/chicken/Kenya/KE0576/2015 | (Ogali <i>et al.</i> , 2018) |
|              |          | KY007044 | V  | 2015 | Kenya    | NDV/chicken/Kenya/KE0733/2015 |                              |
|              |          | KY007045 | V  | 2015 | Kenya    | NDV/chicken/Kenya/KE0679/2015 |                              |
|              |          | KY007046 | V  | 2015 | Kenya    | NDV/chicken/Kenya/KE0673/2015 |                              |
|              |          | KY007047 | V  | 2015 | Kenya    | NDV/chicken/Kenya/KE0601/2015 |                              |
|              |          | KY007048 | V  | 2016 | Kenya    | NDV/chicken/Kenya/KE1002/2016 |                              |
|              |          | KY007049 | V  | 2015 | Kenya    | NDV/chicken/Kenya/KE0678/2015 |                              |
|              |          | KY007050 | V  | 2015 | Kenya    | NDV/chicken/Kenya/KE0697/2015 |                              |
|              |          | KY007051 | V  | 2015 | Kenya    | NDV/chicken/Kenya/KE0695/2015 |                              |
|              |          | KY007052 | V  | 2015 | Kenya    | NDV/chicken/Kenya/KE0687/2015 |                              |

|  |          |          |     |      |       |                                                             |                                 |
|--|----------|----------|-----|------|-------|-------------------------------------------------------------|---------------------------------|
|  |          | KY007053 | V   | 2015 | Kenya | NDV/chicken/Kenya/KE0676/2015                               |                                 |
|  |          | KY007054 | V   | 2016 | Kenya | NDV/chicken/Kenya/KE2055/2016                               |                                 |
|  |          | KY007055 | V   | 2016 | Kenya | NDV/chicken/Kenya/KE2054/2016                               |                                 |
|  |          | KY007056 | V   | 2015 | Kenya | NDV/chicken/Kenya/KE0715/2015                               |                                 |
|  |          | KY007057 | V   | 2016 | Kenya | NDV/chicken/Kenya/KE1004/2016                               |                                 |
|  |          | KY007058 | V   | 2015 | Kenya | NDV/chicken/Kenya/KE0525/2015                               |                                 |
|  |          | KY007059 | V   | 2015 | Kenya | NDV/chicken/Kenya/KE0410/2015                               |                                 |
|  |          | KY007060 | V   | 2015 | Kenya | NDV/chicken/Kenya/KE0647/2015                               |                                 |
|  |          | KY007061 | V   | 2015 | Kenya | NDV/chicken/Kenya/KE0638/2015                               |                                 |
|  |          | KY007062 | V   | 2015 | Kenya | NDV/chicken/Kenya/KE0660/2015                               |                                 |
|  |          | KY007063 | V   | 2016 | Kenya | NDV/chicken/Kenya/KE0523/2015                               |                                 |
|  | <b>2</b> | MN685354 | V   | 2015 | Kenya | Kenya/chicken/Makueni/KE001/2015                            | (Ogali <i>et al.</i> , 2020)    |
|  |          | MN685355 | V   | 2016 | Kenya | Kenya/chicken/Mombasa/KE0811/2016                           |                                 |
|  |          | MN685356 | V   | 2015 | Kenya | Kenya/chicken/Malaba/KE0698/2015                            |                                 |
|  | <b>3</b> | MW342776 | V.3 | 2017 | Kenya | MW342776/ck/KE/Nairobi/Kariobangi_Nor<br>th/A376/2017/(V.3) | (Kariithi <i>et al.</i> , 2021) |
|  |          | MW342777 | V.3 | 2017 | Kenya | MW342777/ck/KE/Nairobi/Kariobangi_Nor<br>th/A371/2017/(V.3) |                                 |
|  |          | MW342778 | V.3 | 2017 | Kenya | MW342778/ck/KE/Nairobi/Kariobangi_Nor<br>th/A374/2017/(V.3) |                                 |
|  |          | MW342779 | V.3 | 2017 | Kenya | MW342779/ck/KE/Nairobi/Kariobangi_Nor<br>th/A373/2017/(V.3) |                                 |
|  |          | MW342780 | V.3 | 2018 | Kenya | MW342780/ck/KE/Kilifi/Sokoni/3FB28/201<br>8/(V.3)           |                                 |
|  |          | MW342781 | V.3 | 2018 | Kenya | MW342781/ck/KE/Kilifi/Sokoni/3FB35/201<br>8/(V.3)           |                                 |
|  |          | MW342782 | V.3 | 2018 | Kenya | MW342782/ck/KE/Kilifi/Sokoni/3FB31/201<br>8/(V.3)           |                                 |
|  |          | MW342783 | V.3 | 2018 | Kenya | MW342783/ck/KE/Kilifi/Sokoni/3FB33/201<br>8/(V.3)           |                                 |

|  |  |          |     |      |       |                                                         |  |
|--|--|----------|-----|------|-------|---------------------------------------------------------|--|
|  |  | MW342784 | V.3 | 2018 | Kenya | MW342784/ck/KE/Kilifi/Sokoni/3FB26/2018/(V.3)           |  |
|  |  | MW342785 | V.3 | 2018 | Kenya | MW342785/ck/KE/Kilifi/Sokoni/3FB32/2018/(V.3)           |  |
|  |  | MW342786 | V.3 | 2018 | Kenya | MW342786/ck/KE/Kilifi/Sokoni/3FB34/2018/(V.3)           |  |
|  |  | MW342787 | V.3 | 2018 | Kenya | MW342782/ck/KE/Kilifi/Sokoni/3FB31/2018/(V.3)           |  |
|  |  | MW342788 | V.3 | 2018 | Kenya | MW342788/ck/KE/Kilifi/Rabai/3FB128/2018/(V.3)           |  |
|  |  | MW342789 | V.3 | 2017 | Kenya | MW342789/ck/KE/Nairobi/Burma/A148/2017/(V.3)            |  |
|  |  | MW342790 | V.3 | 2017 | Kenya | MW342790/ck/KE/Bomet/Kapkwon/34MB09/2017/(V.3)          |  |
|  |  | MW342791 | V.3 | 2017 | Kenya | MW342791/ck/KE/Nairobi/Burma/A144/2017/(V.3)            |  |
|  |  | MW342792 | V.3 | 2018 | Kenya | MW342792/ck/KE/Mombasa/Changamwe/1MB35/2018/(V.3)       |  |
|  |  | MW342793 | V.3 | 2018 | Kenya | MW342793/ck/KE/Mombasa/Changamwe/1MB40/2018/(V.3)       |  |
|  |  | MW342794 | V.3 | 2018 | Kenya | MW342794/ck/KE/Mombasa/Changamwe/1MB23/2018/(V.3)       |  |
|  |  | MW342795 | V.3 | 2018 | Kenya | MW342795/ck/KE/Mombasa/Changamwe/1MB42/2018/(V.3)       |  |
|  |  | MW342796 | V.3 | 2017 | Kenya | MW342796/ck/KE/Nairobi/Kariobangi_North/A369/2017/(V.3) |  |
|  |  | MW342797 | V.3 | 2018 | Kenya | MW342797/ck/KE/Kilifi/3FB16/2018/(V.3)                  |  |
|  |  | MW342798 | V.3 | 2018 | Kenya | MW342798/ck/KE/Kilifi/3FB15/2018/(V.3)                  |  |
|  |  | MW342799 | V.3 | 2018 | Kenya | MW342799/ck/KE/Kilifi/MwembeKuku/3MB14/2018/(V.3)       |  |
|  |  | MW342800 | V.3 | 2017 | Kenya | MW342800/ck/KE/Nairobi/Kariobangi_North/A375/2017/(V.3) |  |

|               |          |          |         |      |        |                                                   |                                 |
|---------------|----------|----------|---------|------|--------|---------------------------------------------------|---------------------------------|
|               |          | MW342801 | V.3     | 2018 | Kenya  | MW342801/ck/KE/Kilifi/Mtwapa/3FB129/2018/(V.3)    |                                 |
|               |          | MW342802 | V.3     | 2018 | Kenya  | MW342802/ck/KE/Kilifi/MwembeKuku/3MB09/2018/(V.3) |                                 |
|               |          | MW342803 | V.3     | 2017 | Kenya  | MW342803/ck/KE/Nairobi/Burma/A101/2017/(V.3)      |                                 |
|               |          | MW342804 | V.3     | 2017 | Kenya  | MW342804/ck/KE/Nairobi/Burma/A105/2017/(V.3)      |                                 |
|               |          | MW342805 | V.3     | 2017 | Kenya  | MW342805/ck/KE/Nairobi/Burma/A104/2017/(V.3)      |                                 |
|               |          | MW342806 | V.3     | 2017 | Kenya  | MW342806/ck/KE/Nairobi/Burma/A142/2017/(V.3)      |                                 |
|               |          | MW342807 | V.3     | 2017 | Kenya  | MW342807/ck/KE/Nairobi/Kangemi/A5136/2017/(V.3)   |                                 |
|               | <b>4</b> | AY288997 | V       | 1994 | Kenya  | Chicken/Kenya/KRC-150/94                          | (Pedersen <i>et al.</i> , 2004) |
| <b>Sudan</b>  | <b>1</b> | GQ258675 | VII.1.1 | 2004 | Sudan  | Chicken/Sudan/08/2004                             | (Hassan <i>et al.</i> , 2010)   |
|               |          | GQ258672 | VII.1.1 | 2004 | Sudan  | Chicken/Sudan/05/2004                             |                                 |
|               |          | GQ258671 | VII.1.1 | 2003 | Sudan  | Chicken/Sudan/04/2003                             |                                 |
|               |          | GQ258670 | VII.1.1 | 2003 | Sudan  | Chicken/Sudan/03/2003                             |                                 |
|               |          | GQ258673 | VII.1.1 | 2006 | Sudan  | Chicken/Sudan/06/2006                             |                                 |
|               |          | GQ258669 | VII.1.1 | 2005 | Sudan  | Chicken/Sudan/02/2005                             |                                 |
|               |          | GQ258674 | IV      | 1987 | Sudan  | Chicken/Sudan/Obied/1987                          |                                 |
|               | <b>2</b> | AY151384 | VI      | 1975 | Sudan  | SD-2/75                                           | (Ujvári <i>et al.</i> , 2003)   |
|               |          | AY151383 | VI      | 1975 | Sudan  | SD-3/75                                           |                                 |
|               |          | AY151385 | VI      | 1975 | Sudan  | SD-4/75                                           |                                 |
|               |          |          |         |      |        |                                                   |                                 |
| <b>Uganda</b> | <b>1</b> | LT549451 | II      | 2011 | Uganda | NDV/Waterfowl/Uganda/MU138/2011                   | (Omony <i>et al.</i> , 2021)    |
|               |          | LT549452 | II      | 2011 | Uganda | NDV/Waterfowl/Uganda/MU150/2011                   |                                 |
|               |          | LT549453 | II      | 2011 | Uganda | NDV/Waterfowl/Uganda/MU186/2011                   |                                 |



|  |          |           |    |      |        |                                    |                                  |
|--|----------|-----------|----|------|--------|------------------------------------|----------------------------------|
|  |          | HG937567  | V  | 2011 | Uganda | NDV/Chicken/Uganda/MU001/2011      |                                  |
|  |          | HG937568  | V  | 2011 | Uganda | NDV/Chicken/Uganda/MU007/2011      |                                  |
|  |          | HG937569  | V  | 2011 | Uganda | NDV/Chicken/Uganda/MU009/2011      |                                  |
|  |          | HG937570  | V  | 2011 | Uganda | NDV/Chicken/Uganda/MU010/2011      |                                  |
|  |          | HG937571  | V  | 2011 | Uganda | NDV/Chicken/Uganda/MU0138/2011     |                                  |
|  |          | HG937572  | V  | 2011 | Uganda | NDV/Chicken/Uganda/MU019/2011      |                                  |
|  |          | HG937573  | V  | 2011 | Uganda | NDV/Chicken/Uganda/MU024/2011      |                                  |
|  |          | HG937574  | V  | 2011 | Uganda | NDV/Chicken/Uganda/MU026/2011      |                                  |
|  |          | HG937575  | V  | 2011 | Uganda | NDV/Chicken/Uganda/MU032/2011      |                                  |
|  |          | HG937576  | V  | 2011 | Uganda | NDV/Chicken/Uganda/MU033/2011      |                                  |
|  |          | HG937577  | V  | 2011 | Uganda | NDV/Chicken/Uganda/MU035/2011      |                                  |
|  |          | HG937578  | V  | 2011 | Uganda | NDV/Chicken/Uganda/MU037/2011      |                                  |
|  |          | HG937579  | V  | 2011 | Uganda | NDV/Chicken/Uganda/MU039/2011      |                                  |
|  |          | HG937580  | V  | 2011 | Uganda | NDV/Chicken/Uganda/MU040/2011      |                                  |
|  |          | HG937581  | V  | 2011 | Uganda | NDV/Chicken/Uganda/MU044/2011      |                                  |
|  |          | HG937582  | V  | 2011 | Uganda | NDV/Chicken/Uganda/MU050/2011      |                                  |
|  |          | HG937583  | V  | 2011 | Uganda | NDV/Chicken/Uganda/MU056/2011      |                                  |
|  |          | HG937584  | V  | 2011 | Uganda | NDV/Chicken/Uganda/MU062/2011      |                                  |
|  |          | HG937585  | V  | 2011 | Uganda | NDV/Chicken/Uganda/MU069/2011      |                                  |
|  |          | HG937586  | V  | 2011 | Uganda | NDV/Chicken/Uganda/MU071/2011      |                                  |
|  |          | HG937587  | V  | 2011 | Uganda | NDV/Chicken/Uganda/MU074/2011      |                                  |
|  |          | HG937588  | V  | 2011 | Uganda | NDV/Chicken/Uganda/MU084/2011      |                                  |
|  |          | HG937589  | V  | 2011 | Uganda | NDV/Chicken/Uganda/MU090/2011      |                                  |
|  |          | HG937590  | V  | 2011 | Uganda | NDV/Chicken/Uganda/MU111/2011      |                                  |
|  |          | HG937591  | V  | 2011 | Uganda | NDV/Chicken/Uganda/MU113/2011      |                                  |
|  | <b>2</b> | LT549451  | II | 2011 | Uganda | APMV-1/waterfowl/Uganda/MU138/2011 | (Wanyana <i>et al.</i> , 2018)   |
|  |          | LT549452  | II | 2011 | Uganda | APMV-1/waterfowl/Uganda/MU150/2011 |                                  |
|  |          | LT549453. | II | 2011 | Uganda | APMV-1/waterfowl/Uganda/MU186/2011 |                                  |
|  | <b>3</b> | HG937535  | V  | 2011 | Uganda | NDV/chicken/Uganda/MU001/2011      | (Byarugaba <i>et al.</i> , 2014) |

|  |  |          |   |      |        |                               |  |
|--|--|----------|---|------|--------|-------------------------------|--|
|  |  | HG937536 | V | 2011 | Uganda | NDV/chicken/Uganda/MU007/2011 |  |
|  |  | HG937537 | V | 2011 | Uganda | NDV/chicken/Uganda/MU009/2011 |  |
|  |  | HG937538 | V | 2011 | Uganda | NDV/chicken/Uganda/MU010/2011 |  |
|  |  | HG937539 | V | 2011 | Uganda | NDV/chicken/Uganda/MU013/2011 |  |
|  |  | HG937540 | V | 2011 | Uganda | NDV/chicken/Uganda/MU014/2011 |  |
|  |  | HG937541 | V | 2011 | Uganda | NDV/chicken/Uganda/MU019/2011 |  |
|  |  | HG937542 | V | 2011 | Uganda | NDV/chicken/Uganda/MU022/2011 |  |
|  |  | HG937573 | V | 2011 | Uganda | NDV/chicken/Uganda/MU024/2011 |  |
|  |  | HG937543 | V | 2011 | Uganda | NDV/chicken/Uganda/MU026/2011 |  |
|  |  | HG937544 | V | 2011 | Uganda | NDV/chicken/Uganda/MU029/2011 |  |
|  |  | HG937545 | V | 2011 | Uganda | NDV/chicken/Uganda/MU030/2011 |  |
|  |  | HG937546 | V | 2011 | Uganda | NDV/chicken/Uganda/MU031/2011 |  |
|  |  | HG937575 | V | 2011 | Uganda | NDV/chicken/Uganda/MU032/2011 |  |
|  |  | HG937576 | V | 2011 | Uganda | NDV/chicken/Uganda/MU033/2011 |  |
|  |  | HG937547 | V | 2011 | Uganda | NDV/chicken/Uganda/MU035/2011 |  |
|  |  | HG937578 | V | 2011 | Uganda | NDV/chicken/Uganda/MU037/2011 |  |
|  |  | HG937548 | V | 2011 | Uganda | NDV/chicken/Uganda/MU039/2011 |  |
|  |  | HG937580 | V | 2011 | Uganda | NDV/chicken/Uganda/MU040/2011 |  |
|  |  | HG937581 | V | 2011 | Uganda | NDV/chicken/Uganda/MU044/2011 |  |
|  |  | HG937582 | V | 2011 | Uganda | NDV/chicken/Uganda/MU050/2011 |  |
|  |  | HG937550 | V | 2011 | Uganda | NDV/chicken/Uganda/MU052/2011 |  |
|  |  | HG937551 | V | 2011 | Uganda | NDV/chicken/Uganda/MU054/2011 |  |
|  |  | HG937552 | V | 2011 | Uganda | NDV/chicken/Uganda/MU056/2011 |  |
|  |  | HG937535 | V | 2011 | Uganda | NDV/chicken/Uganda/MU058/2011 |  |
|  |  | HG937553 | V | 2011 | Uganda | NDV/chicken/Uganda/MU059/2011 |  |
|  |  | HG937584 | V | 2011 | Uganda | NDV/duck/Uganda/MU062/2011    |  |
|  |  | HG937554 | V | 2011 | Uganda | NDV/chicken/Uganda/MU069/2011 |  |
|  |  | HG937555 | V | 2011 | Uganda | NDV/chicken/Uganda/MU071/2011 |  |
|  |  | HG937556 | V | 2011 | Uganda | NDV/chicken/Uganda/MU072/2011 |  |
|  |  | HG937557 | V | 2011 | Uganda | NDV/chicken/Uganda/MU074/2011 |  |
|  |  | HG937558 | V | 2011 | Uganda | NDV/chicken/Uganda/MU077/2011 |  |

|  |          |          |            |      |        |                               |                             |
|--|----------|----------|------------|------|--------|-------------------------------|-----------------------------|
|  |          | HG937559 | V          | 2011 | Uganda | NDV/chicken/Uganda/MU083/2011 |                             |
|  |          | HG937560 | V          | 2011 | Uganda | NDV/chicken/Uganda/MU084/2011 |                             |
|  |          | HG937561 | V          | 2011 | Uganda | NDV/chicken/Uganda/MU090/2011 |                             |
|  |          | HG937562 | V          | 2011 | Uganda | NDV/chicken/Uganda/MU091/2011 |                             |
|  |          | HG937563 | V          | 2011 | Uganda | NDV/chicken/Uganda/MU096/2011 |                             |
|  |          | HG937564 | V          | 2011 | Uganda | NDV/chicken/Uganda/MU098/2011 |                             |
|  |          | HG937565 | V          | 2011 | Uganda | NDV/chicken/Uganda/MU108/2011 |                             |
|  |          | HG937566 | V          | 2011 | Uganda | NDV/chicken/Uganda/MU111/2011 |                             |
|  |          | HG937591 | V          | 2011 | Uganda | NDV/chicken/Uganda/MU113/2011 |                             |
|  | <b>4</b> | AY367559 | VI.2.1.1.1 | 2001 | Uganda | Chicken/Pallisa/0405/01       | (Otim <i>et al.</i> , 2004) |
|  |          | AY371991 | VI.2.1.1.1 | 2001 | Uganda | Chicken/Pallisa/0208/01       |                             |
|  |          | AY371992 | VI.2.1.1.1 | 2001 | Uganda | Chicken/Soroti/0104/01        |                             |
|  |          | AY371993 | VI.2.1.1.1 | 2001 | Uganda | Chicken/Pallisa/0406/01       |                             |
|  |          | AY371994 | VI.2.1.1.1 | 2001 | Uganda | Chicken/Pallisa/0321/01       |                             |
|  |          | AY371995 | VI.2.1.1.1 | 2001 | Uganda | Chicken/Pallisa/0305/01       |                             |
|  |          | AY371996 | VI.2.1.1.1 | 2001 | Uganda | Chicken/Soroti/0509/01        |                             |
|  |          | AY371998 | VI.2.1.1.1 | 2001 | Uganda | Chicken/Tororo/0222/01        |                             |
|  |          | AY371999 | VI.2.1.1.1 | 2001 | Uganda | Chicken/Pallisa/0405/01       |                             |
|  |          | AY372000 | VI.2.1.1.1 | 2001 | Uganda | Chicken/Pallisa/0408/01       |                             |
|  |          | AY372001 | VI.2.1.1.1 | 2001 | Uganda | Chicken/Soroti/0814/01        |                             |
|  |          | AY372002 | VI.2.1.1.1 | 2001 | Uganda | Chicken/Pallisa/0609/01       |                             |

|                 |          |          |            |      |          |                                                     |                                |
|-----------------|----------|----------|------------|------|----------|-----------------------------------------------------|--------------------------------|
|                 |          | AY372003 | VI.2.1.1.1 | 2001 | Uganda   | Chicken/Pallisa/0206/01                             |                                |
|                 |          | AY372004 | VI.2.1.1.1 | 2001 | Uganda   | Chicken/Pallisa/0102/01.                            |                                |
|                 |          | AY372005 | VI.2.1.1.1 | 2001 | Uganda   | Chicken/Pallisa/0407/01                             |                                |
|                 |          | AY372006 | VI.2.1.1.1 | 2001 | Uganda   | Chicken/Pallisa/0515/01                             |                                |
|                 |          | AY371997 | VI.2.1.1.1 | 2001 | Uganda   | Chicken/Pallisa/0103/01                             |                                |
| <b>Burundi</b>  | <b>1</b> | FJ772490 | XIII.1.1   | 2008 | Burundi  | chicken-4132-12-Burundi-2008                        | (Cattoli <i>et al.</i> , 2010) |
|                 |          | FJ772493 | XIII.1.1   | 2008 | Burundi  | chicken-4132-20-Burundi-2008                        |                                |
| <b>Ethiopia</b> | <b>1</b> |          | VI         | 1976 | Ethiopia | APMV1/Chk/ETH/R1825/09/1976                         | (Bari <i>et al.</i> , 2021)    |
|                 |          |          | VI         | 1984 | Ethiopia | APMV1/Chk/ETH/R655/08/1984                          |                                |
|                 |          |          | VI         | 1997 | Ethiopia | APMV1/Chk/ETH/R645/08/1997                          |                                |
|                 |          |          | VI         | 1997 | Ethiopia | APMV1/Chk/ETH/R647/08/1997                          |                                |
|                 |          |          | VI         | 1997 | Ethiopia | APMV1/Chk/ETH/R652/08/1997                          |                                |
|                 |          |          | VI         | 1997 | Ethiopia | APMV1/Chk/ETH/R656/08/1997                          |                                |
|                 |          |          | VI         | 1997 | Ethiopia | APMV1/Chk/ETH/R657/08/1997                          |                                |
|                 |          |          | VI         | 2000 | Ethiopia | APMV1/Chk/ETH/R653/08/2000                          |                                |
|                 |          |          | VI         | 2002 | Ethiopia | APMV1/Chk/ETH/R644/08/2002                          |                                |
|                 |          |          | VI         | 2007 | Ethiopia | APMV1/Chk/ETH/R650/08/2007                          |                                |
|                 | <b>2</b> | KR014202 | VI.2.1.1.1 | 2014 | Ethiopia | APMV-1/Pigeon/Ethiopia/14VIR4296-2/2773/14/2/2014   | (Damena <i>et al.</i> , 2016)  |
|                 |          | KR014203 | VI.2.1.1.1 | 2014 | Ethiopia | APMV-1/Pigeon/Ethiopia/14VIR4296-4/2773/14/4/2014   |                                |
|                 |          | KR014204 | VI.2.1.1.1 | 2014 | Ethiopia | APMV-1/Pigeon/Ethiopia/14VIR4296-6/2773/14/6/2014   |                                |
|                 |          | KR014205 | VI.2.1.1.1 | 2014 | Ethiopia | APMV-1/Pigeon/Ethiopia/14VIR4296-10/2773/14/10/2014 |                                |
|                 |          | KR014206 | VI.1.2.2.1 | 2012 | Ethiopia | APMV-1/Chicken/Ethiopia/14VIR4296-20/1294/2012      |                                |

|  |          |          |            |      |          |                                                 |                               |
|--|----------|----------|------------|------|----------|-------------------------------------------------|-------------------------------|
|  |          | KR014207 | VI.1.2.2.1 | 2012 | Ethiopia | APMV-1/Chicken/Ethiopia/14VIR4296-21/2576/2012  |                               |
|  |          | KR014208 | VI.1.2.2.1 | 2014 | Ethiopia | APMV-1/Chicken/Ethiopia/14VIR4296-22/3083/2014  |                               |
|  |          | KR014209 | VI.1.2.2.1 | 2014 | Ethiopia | APMV-1/Chicken/Ethiopia/14VIR4296-23/15925/2014 |                               |
|  |          | KR014210 | VI.1.2.2.1 | 2013 | Ethiopia | APMV-1/Chicken/Ethiopia/14VIR4296-24/19768/2013 |                               |
|  |          | KR014211 | VI.1.2.2.1 | 2013 | Ethiopia | APMV-1/Chicken/Ethiopia/14VIR4296-25/20045/2013 |                               |
|  |          | KR014212 | VI.1.2.2.1 | 2013 | Ethiopia | APMV-1/Chicken/Ethiopia/14VIR4296-26/20112/2013 |                               |
|  |          | KR014213 | VI.1.2.2.1 | 2013 | Ethiopia | APMV-1/Chicken/Ethiopia/14VIR4296-27/35828/2013 |                               |
|  | <b>3</b> | KC851841 | VII        |      | Ethiopia | 12RS1402-39/APMV1/CK/ Ethiopia                  | (Fentie <i>et al.</i> , 2014) |
|  |          | KC851842 | II         |      | Ethiopia |                                                 |                               |
