# Supplementary material for: Genomic Diversity and Geographic Distribution of Newcastle Disease Virus Genotypes in Africa: Implications for Diagnosis, Vaccination, and Regional Collaboration
Source: MDPI journal article supplement (doi:10.3390/v16050795), 2024-05-16
Supplement: s1 [file s1]

**Table S2: Distribution of class II NDV genotypes in Southern Africa**

| Country      | Paper | Isolate GenBank accession number | Genotype | Year of collection | Country                        | Isolate name    | Reference                      |
|--------------|-------|----------------------------------|----------|--------------------|--------------------------------|-----------------|--------------------------------|
| South Africa | 1     | AY210492                         | II       | 1995               | South Africa, district unknown | ZA1454/UP/95    | (Abolnik <i>et al.</i> , 2004) |
|              |       | AY210489                         | II       | 1997               | Arnot                          | ZA719/UP/97     |                                |
|              |       | AF532145                         | II       | 1996               | KwaZulu/Natal                  | ZA202/B/96      |                                |
|              |       | AF532149                         | II       | 1999               | Dundee                         | ZA307/B/99      |                                |
|              |       | AF532152                         | II       | 1999               | Port Shepstone area            | ZA312/B/99      |                                |
|              |       | AY210490                         | II       | 1999               | Hartebeespoort Dam area        | ZA1366/UP/99    |                                |
|              |       | AF532741                         | I        | 1999               | Port Shepstone area            | ZA340/P/99      |                                |
|              |       | AY210491                         | II       | 2000               | Pretoria                       | ZA680/UP/00     |                                |
|              |       | AF532744                         | II       | 2000               | Camperdown area                | ZA375/B/00      |                                |
|              |       | AF532742                         | I        | 2000               | Estcourt                       | ZA370/B/00      |                                |
|              |       | AY210493                         | II       | 2001               | Worcester                      | ZA12150/Worc/01 |                                |
|              |       | AF532747                         | II       | 2001               | Estcourt                       | ZA393/B/01      |                                |
|              |       | AF532749                         | II       | 2001               | Camperdown area                | ZA405/BB/01     |                                |
|              |       | AF532746                         | II       | 2001               | Camperdown area                | ZA385/B/01      |                                |
|              |       | AF532743                         | I        | 2001               | Gauteng                        | ZA37401/X/01    |                                |
|              |       | AF532142                         | VIII     | 1991               | Richmond                       | ZA13/L/91       |                                |
|              |       | AF136766                         | VIII     | 1990               | South Africa, district unknown | ZA-18/90        |                                |
|              |       | AF136775                         | VIII     | 1990               | South Africa, district unknown | ZA-17/90        |                                |
|              |       | AF532143                         | VIII     | 1991               | Richmond                       | ZA16/GF/91      |                                |
|              |       | AF532752                         | VIII     | 1991               | Lion's River/Merrivale         | ZA19/B/91       |                                |
|              |       | AF532140                         | VIII     | 1991               | Pietermaritzburg/Thornville    | ZA11/B/91       |                                |
|              |       | AF136773                         | VIII     | 1994               | South Africa, district unknown | ZA-34/94        |                                |
|              |       | AF352139                         | VII.1.1  | 1994               | Estcourt                       | ZA108/L/94      |                                |
|              |       | AF532751                         | VII.1.1  | 1994               | Camperdown area                | ZA71/B/94       |                                |
|              |       | AF532750                         | VII.1.1  | 1994               | Camperdown area                | ZA60/B/94       |                                |

|  |          |          |         |        |                                |                                  |                                |
|--|----------|----------|---------|--------|--------------------------------|----------------------------------|--------------------------------|
|  |          | AF532141 | VII.1.1 | 1994   | Pretoria                       | ZA110/X/94                       |                                |
|  |          | AF532749 | VII.1.1 | 1994   | Camperdown area                | ZA52/BB/94                       |                                |
|  |          | AF532144 | VII.1.1 | 1995   | Lower Tugela/Umhlali           | ZA170/B/95                       |                                |
|  |          | AF136774 | VII.1.1 | 1995   | South Africa, district unknown | ZA-35/95                         |                                |
|  |          | AF109884 | VII.1.1 | 1996   | United Arab Emirates           | AE232/1/96                       |                                |
|  |          | AY210494 | VII.1.1 | 1997   | Kuruman                        | ZA839/UP/97                      |                                |
|  |          | AY210504 | VII.1.1 | 1997   | Pretoria                       | ZA842/UP/97                      |                                |
|  |          | AY210499 | VII.1.1 | 1997   | Potgietersrus                  | ZA825/UP/97                      |                                |
|  |          | AF532146 | VII.1.1 | 1997   | Pretoria                       | ZA256/X/97                       |                                |
|  |          | AY210505 | VII.1.1 | 1998   | Pretoria                       | ZA751/UP/98                      |                                |
|  |          | AY210506 | VII.1.1 | 1998   | Rustenburg                     | ZA874/UP/98                      |                                |
|  |          | AY210508 | VII.1.1 | 1998   | Rustenburg                     | ZA704/UP/98                      |                                |
|  |          | AY210509 | VII.1.1 | 1998   | Rustenburg                     | ZA983/UP/98                      |                                |
|  |          | AY210511 | VII.1.1 | 1998   | Hammarisdale                   | ZA444/B/98                       |                                |
|  |          | AY210502 | VII.1.1 | 1998   | Riversdale                     | ZA7351/Rvsdl/98                  |                                |
|  |          | AF532148 | VII.1.1 | 1998   | Durban                         | ZA296/L/98                       |                                |
|  |          | AY210512 | VII.1.1 | 1998   | Western Cape                   | ZA7381/98                        |                                |
|  |          | AF532739 | VII.1.1 | 1999   | Stanger                        | ZA331/B/99                       |                                |
|  |          | AF532150 | VII.1.1 | 1999   | New Hanover/Wartburg           | ZA308/B/99                       |                                |
|  |          | AY210510 | VII.1.1 | 1999   | Pretoria                       | ZA1320/UP/99                     |                                |
|  |          | AY210501 | VII.1.1 | 1999   | Halfway House                  | ZA1521/UP/99                     |                                |
|  |          | AF532740 | VII.1.1 | 1999   | Camperdown area                | ZA335/B/99                       |                                |
|  |          | AY210500 | VII.1.1 | 1999   | Potchefstroom                  | ZA549/UP/99                      |                                |
|  |          | AF532151 | VII.1.1 | 1999   | Pietersburg                    | ZA309/B/99                       |                                |
|  |          | AY210503 | VII.1.1 | 1999   | Klapmuts                       | ZA3291/Klpmts/99                 |                                |
|  |          | AY210496 | VIII    | 2000   | Pretoria                       | ZA598/UP/00                      |                                |
|  |          | AY210497 | VIII    | 2000   | Pretoria                       | ZA606/UP/00                      |                                |
|  |          | AF532745 | VII.1.1 | 2000   | Port Shepstone area            | ZA378/F/00                       |                                |
|  | <b>2</b> | MF622035 | VII.2   | Aug-13 | South Africa                   | Chicken/South Africa/230665/2013 | (Abolnik <i>et al.</i> , 2018) |
|  |          | KR815908 | VII.2   | Oct-13 | South Africa                   | Turkey/South Africa/N2057/2013   |                                |

|                   |          |          |         |        |              |                                    |                                |
|-------------------|----------|----------|---------|--------|--------------|------------------------------------|--------------------------------|
|                   |          | MF622045 | VII.2   | Nov-13 | South Africa | Chicken/South Africa/RBNW-1/2013   |                                |
|                   |          | MF622046 | VII.2   | Nov-13 | South Africa | Chicken/South Africa/RBNW-2/2013   |                                |
|                   |          | MF622047 | VII.2   | Nov-13 | South Africa | Chicken/South Africa/RBNW-3/2013   |                                |
|                   |          | MF622040 | VII.2   | Nov-13 | South Africa | Chicken/South Africa/Inchanga/2013 |                                |
|                   |          | MF622037 | VII.2   | Nov-13 | South Africa | Chicken/South Africa/239391/2013   |                                |
|                   |          | MF622039 | VII.2   | Sep-14 | South Africa | Chicken/South Africa/H14973/2014   |                                |
|                   |          | MF622034 | VII.2   | Jul-15 | South Africa | Chicken/South Africa/32995/2015    |                                |
|                   |          | MF622043 | VII.2   | Aug-15 | South Africa | Chicken/South Africa/N2117/2015    |                                |
|                   |          | MF622044 | VII.2   | Nov-15 | South Africa | Chicken/South Africa/N2683/2015    |                                |
|                   | <b>3</b> | AF136762 | VIII    | 1968   | South Africa | ZA-5/68                            | (Herczeg <i>et al.</i> , 1999) |
|                   |          | AF136763 | VIII    | 1974   | South Africa | ZA-10/74                           |                                |
|                   |          | AF136764 | VIII    | 1990   | South Africa | ZA-16/90                           |                                |
|                   |          | AF136775 | VIII    | 1990   | South Africa | ZA-17/90                           |                                |
|                   |          | AF136766 | VIII    | 1990   | South Africa | ZA-18/90                           |                                |
|                   |          | AF136767 | VII.1.1 | 1993   | South Africa | ZA-20/93                           |                                |
|                   |          | AF136768 | VII.1.1 | 1993   | South Africa | ZA-25/93                           |                                |
|                   |          | AF136769 | VII.1.1 | 1993   | South Africa | ZA-26/93                           |                                |
|                   |          | AF136770 | VII.1.1 | 1993   | South Africa | ZA-29/93                           |                                |
|                   |          | AF136771 | VII.1.1 | 1993   | South Africa | ZA-32/93                           |                                |
|                   |          | AF136772 | VII.1.1 | 1994   | South Africa | ZA-33/94                           |                                |
|                   |          | AF136773 | VIII    | 1994   | South Africa | ZA-34/94                           |                                |
|                   |          | AF136774 | VII.1.1 | 1995   | South Africa | ZA-35/95                           |                                |
| <b>Mozambique</b> | <b>1</b> | KX231366 | VII.2   | 2011   | Mozambique   | NDV/chicken/Mozambique/1205/2011   | (Mapaco <i>et al.</i> , 2016)  |
|                   |          | KU523524 | VII.2   | 2012   | Mozambique   | NDV/chicken/Mozambique/466/2012    |                                |
|                   |          | KU523526 | VII.2   | 2012   | Mozambique   | NDV/chicken/Mozambique/491/2012    |                                |

|                 |          |          |         |      |            |                                       |                                    |
|-----------------|----------|----------|---------|------|------------|---------------------------------------|------------------------------------|
|                 |          | KU523528 | VII.2   | 2012 | Mozambique | NDV/chicken/<br>Mozambique/658/2012   |                                    |
|                 |          | KU523529 | VII.2   | 2013 | Mozambique | NDV/chicken/<br>Mozambique/584/2013   |                                    |
|                 |          | MF622036 | VII.2   | 2013 | Mozambique | Chicken/Zimbabwe/ 235280/2013         |                                    |
|                 |          | KX231367 | VII.2   | 2014 | Mozambique | NDV/chicken/<br>Mozambique/475/2014   |                                    |
|                 |          | KU523533 | VII.2   | 2014 | Mozambique | NDV/chicken/<br>Mozambique/622/2014   |                                    |
|                 |          | KX231368 | VII.2   | 2016 | Mozambique | NDV/chicken/<br>Mozambique/192A/2016  |                                    |
|                 | <b>2</b> | HQ702462 | I       | 2005 | Mozambique | chicken/Mozambique/ndv42_564/<br>2005 | (Snoeck <i>et al.</i> ,<br>2009)   |
|                 | <b>3</b> | AF136775 | VII.1.1 | 1994 | Mozambique | MZ 13/94                              | (Herczeg <i>et al.</i> ,<br>1999)  |
|                 |          | AF136776 | VII.1.1 | 1995 | Mozambique | MZ 35/94                              |                                    |
|                 |          | AF136777 | VII.1.1 | 1995 | Mozambique | MZ-44/95                              |                                    |
|                 |          | AF136778 | VII.1.1 | 1995 | Mozambique | MZ-46/95                              |                                    |
|                 |          | AF136779 | VII.1.1 | 1995 | Mozambique | MZ-48/95                              |                                    |
| <b>Botswana</b> | <b>1</b> | MT091950 | VII.2   | 2014 | Botswana   | NDV/Chicken/Botswana/1/2014           | (Kgotlele <i>et al.</i> ,<br>2020) |
|                 |          | MT091951 | VII.2   | 2014 | Botswana   | NDV/Chicken/Botswana/2/2014           |                                    |
|                 |          | MT091952 | VII.2   | 2014 | Botswana   | NDV/Chicken/Botswana/4/2014           |                                    |
|                 |          | MT091953 | VII.2   | 2018 | Botswana   | NDV/Chicken/Botswana/6/2018           |                                    |
|                 |          | MT091954 | VII.2   | 2018 | Botswana   | NDV/Chicken/Botswana/7/2018           |                                    |
|                 |          | MT091955 | VII.2   | 2018 | Botswana   | NDV/Chicken/Botswana/8/2018           |                                    |
|                 |          | MT091956 | VII.2   | 2018 | Botswana   | NDV/Chicken/Botswana/9/2018           |                                    |
|                 |          | MT091957 | VII.2   | 2018 | Botswana   | NDV/Chicken/Botswana/10/2018          |                                    |
|                 |          | MT091958 | VII.2   | 2019 | Botswana   | NDV/Chicken/Botswana/11/2019          |                                    |
|                 |          | MT091959 | VII.2   | 2019 | Botswana   | NDV/Chicken/Botswana/12/2019          |                                    |
|                 |          | MT091960 | VII.2   | 2019 | Botswana   | NDV/Chicken/Botswana/14/2019          |                                    |
|                 |          | MT091961 | VII.2   | 2019 | Botswana   | NDV/Chicken/Botswana/15/2019          |                                    |
|                 |          | MT091962 | VII.2   | 2019 | Botswana   | NDV/Chicken/Botswana/16/2019          |                                    |
|                 |          | MT091963 | VII.2   | 2019 | Botswana   | NDV/Chicken/Botswana/18/2019          |                                    |

|                 |          |          |       |      |          |                               |                                |
|-----------------|----------|----------|-------|------|----------|-------------------------------|--------------------------------|
| <b>Namibia</b>  | <b>1</b> | KY747479 | VII.2 | 2016 | Namibia  | NDV/Chicken/Namibia/5620/2016 | (Molini <i>et al.</i> , 2017)  |
|                 |          | KY747480 | VII.2 | 2016 | Namibia  | NDV/Chicken/Namibia/6195/2016 |                                |
|                 |          | KY747481 | VII.2 | 2016 | Namibia  | NDV/Chicken/Namibia/6196/2016 |                                |
|                 |          | KY747482 | VII.2 | 2016 | Namibia  | NDV/Chicken/Namibia/6403/2016 |                                |
|                 |          | KY747483 | VII.2 | 2016 | Namibia  | NDV/Chicken/Namibia/6762/2016 |                                |
|                 |          | KY747484 | VII.2 | 2016 | Namibia  | NDV/Chicken/Namibia/7362/2016 |                                |
| <b>Zambia</b>   | <b>1</b> | MF409241 | XIII  | 2015 | Zambia   | chicken/Zambia/Chiwoko/2015   | (Abolnik <i>et al.</i> , 2017) |
|                 | <b>2</b> | MF622041 | VII.2 | 2015 | Zambia   | Chicken/Zambia/Katete/ 2015   | (Abolnik <i>et al.</i> , 2018) |
|                 |          | MF622042 | VII.2 | 2015 | Zambia   | Chicken/Zambia/ Mbeweka/2015  |                                |
|                 |          | MF622038 | VII.2 | 2015 | Zambia   | Chicken/Zambia/Chadiza/ 2015  |                                |
| <b>Zimbabwe</b> | <b>1</b> | AY175710 | II    | 1995 | Zimbabwe | AV 862/95 5249                | (Aldous <i>et al.</i> , 2003)  |
|                 | <b>2</b> | MF622036 | VII.2 | 2013 | Zimbabwe | chicken/Zimbabwe/235280/2013  | (Abolnik <i>et al.</i> , 2018) |

## References

- Abolnik, C., Horner, R. F., Bisschop, S. P. R., Parker, M. E., Romito, M., & Viljoen, G. J. (2004). A phylogenetic study of South African Newcastle disease virus strains isolated between 1990 and 2002 suggests epidemiological origins in the Far East. *Archives of Virology*, 149(3), 603–619. <https://doi.org/10.1007/s00705-003-0218-2>
- Abolnik, C., Mubamba, C., Wandrag, D. B. R., Horner, R., Gummow, B., Dautu, G., & Bisschop, S. P. R. (2018). Tracing the origins of genotype VIIh Newcastle disease in southern Africa. *Transboundary and Emerging Diseases*, 65(2), e393–e403. <https://doi.org/10.1111/tbed.12771>
- Abolnik, Celia, Mubamb, C., Dautu, G., & Gummow, B. (2017). Complete genome sequence of a Newcastle disease genotype XIII virus isolated from indigenous chickens in Zambia. *Genome Announcements*, 5(34). <https://doi.org/10.1128/genomeA.00841-17>
- Aldous, E. W., Mynn, J. K., Banks, J., & Alexander, D. J. (2003). A molecular epidemiological study of avian paramyxovirus type 1 (Newcastle disease virus) isolates by phylogenetic analysis of a partial nucleotide sequence of the fusion protein gene. *Avian Pathology*, 32(3), 239–257. <https://doi.org/10.1080/030794503100009783>
- Herczeg, J., Wehmann, E., Bragg, R. R., Travassos Dias, P. M., Hadjiev, G., Werner, O., & Lomniczi, B. (1999). Two novel genetic groups (VIIb and VIII) responsible for recent Newcastle disease outbreaks in Southern Africa, one (VIIb) of which reached Southern Europe. *Archives of Virology*, 144(11), 2087–2099. <https://doi.org/10.1007/s007050050624>
- Kgotlele, T., Modise, B., Nyange, J. F., Thanda, C., Cattoli, G., & Dundon, W. G. (2020). First molecular characterization of avian paramyxovirus-1 (Newcastle disease virus) in Botswana. *Virus Genes*, 56(5), 646–650. <https://doi.org/10.1007/s11262-020-01770-4>
- Mapaco, L. P., Monjane, I. V. A., Nhamusso, A. E., Viljoen, G. J., Dundon, W. G., & Achá, S. J. (2016). Phylogenetic analysis of Newcastle disease viruses isolated from commercial poultry in Mozambique (2011–2016). *Virus Genes*, 52(5), 748–753. <https://doi.org/10.1007/s11262-016-1362-6>
- Molini, U., Aikukutu, G., Khaiseb, S., Cattoli, G., & Dundon, W. G. (2017). First genetic characterization of newcastle disease viruses from Namibia: identification of a novel VIIk subgenotype. *Archives of Virology*, 162(8), 2427–2431. <https://doi.org/10.1007/s00705-017-3389-y>
- Snoeck, C. J., Ducatez, M. F., Owoade, A. A., Faleke, O. O., Alkali, B. R., Tahita, M. C., Tarnagda, Z., Ouedraogo, J. B., Maikano, I., Mbah, P. O., Kremer, J. R., & Muller, C. P. (2009). Newcastle disease virus in West Africa: New virulent strains identified in non-commercial farms. *Archives of Virology*, 154(1), 47–54. <https://doi.org/10.1007/s00705-008-0269-5>
